# Supplementary material for: Single-phase perovskite oxide with super-exchange induced atomic-scale synergistic active centers enables ultrafast hydrogen evolution
Source: PubMed Central journal article supplement (PMC7653924; doi:10.1038/s41467-020-19433-1), 2020-11-09
Supplement: 41467_2020_19433_MOESM1_ESM.pdf [file 41467_2020_19433_MOESM1_ESM.pdf]

**Single-phase perovskite oxide with super-exchange induced  
atomic-scale synergistic active centers enables ultrafast  
hydrogen evolution**

**Dai *et al.***

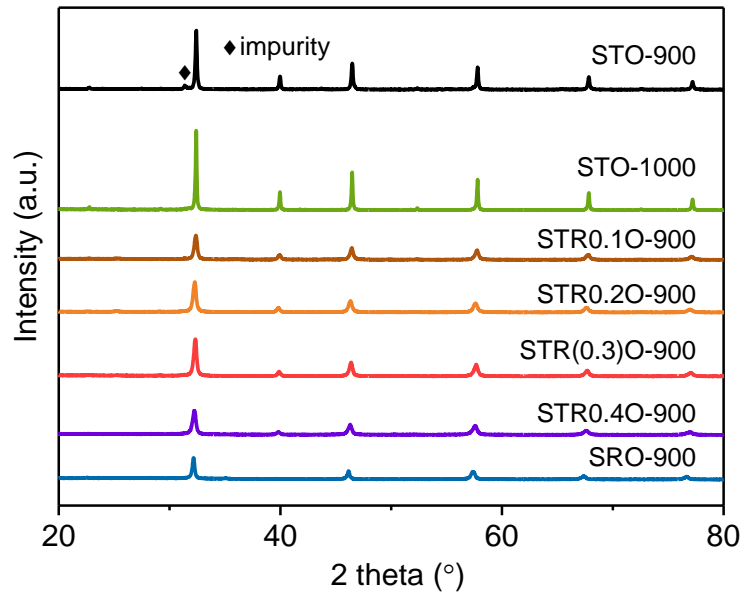

**Supplementary Figure 1.** XRD patterns of  $\text{SrTi}_{1-x}\text{Ru}_x\text{O}_{3-\delta}$ , ( $x=0, 0.1, 0.2, 0.3, 0.4, 1$ ) prepared at calcination temperatures of 900 and 1000 °C.  $\text{SrTiO}_3$ ,  $\text{SrTi}_{0.9}\text{Ru}_{0.1}\text{O}_{3-\delta}$ ,  $\text{SrTi}_{0.8}\text{Ru}_{0.2}\text{O}_{3-\delta}$ ,  $\text{SrTi}_{0.7}\text{Ru}_{0.3}\text{O}_{3-\delta}$ ,  $\text{SrTi}_{0.6}\text{Ru}_{0.4}\text{O}_{3-\delta}$ ,  $\text{SrRuO}_3$  are denoted as STO, STR0.1O, STR0.2O, STR(0.3)O, STR0.4O and SRO, respectively. In addition to the standard cubic phase in XRD patterns of STO-900, some impurity phases were also observed. To avoid complications from the effect of impurity phases on electrocatalytic activity, the calcination temperature for the formation of pure STO phase was chosen to be 1000 °C for study in this work.

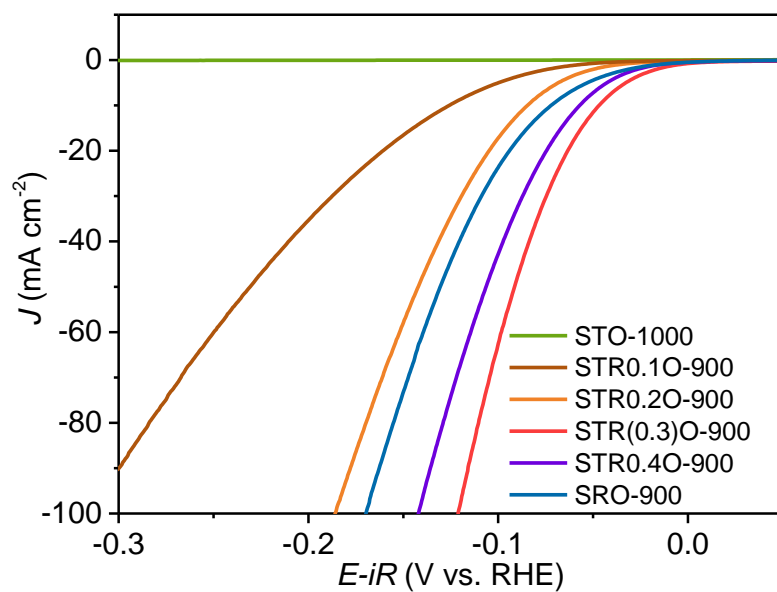

**Supplementary Figure 2.** Polarization curves of  $\text{SrTi}_{1-x}\text{Ru}_x\text{O}_{3-\delta}$  ( $x=0, 0.1, 0.2, 0.3, 0.4, 1$ ) in Ar-saturated 1 M KOH solution at a scan rate of  $5 \text{ mV s}^{-1}$ .

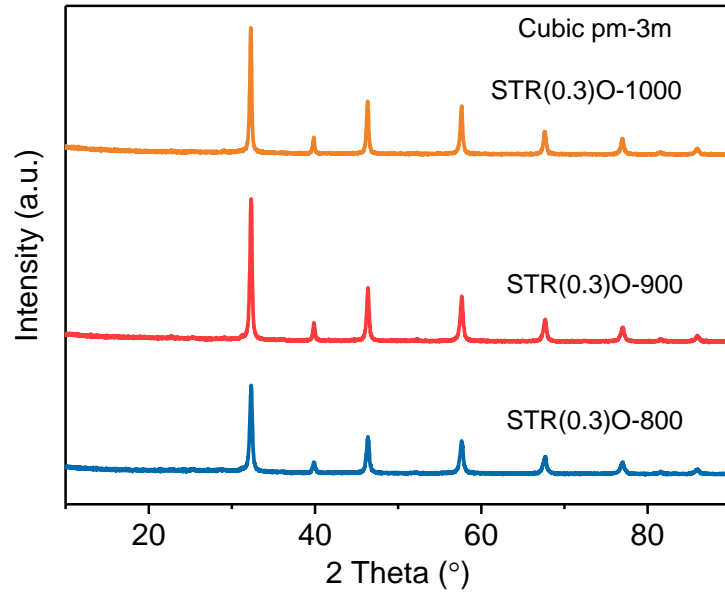

**Supplementary Figure 3.** XRD patterns of STRO prepared at different calcination temperatures of 800, 900, and 1000 °C.

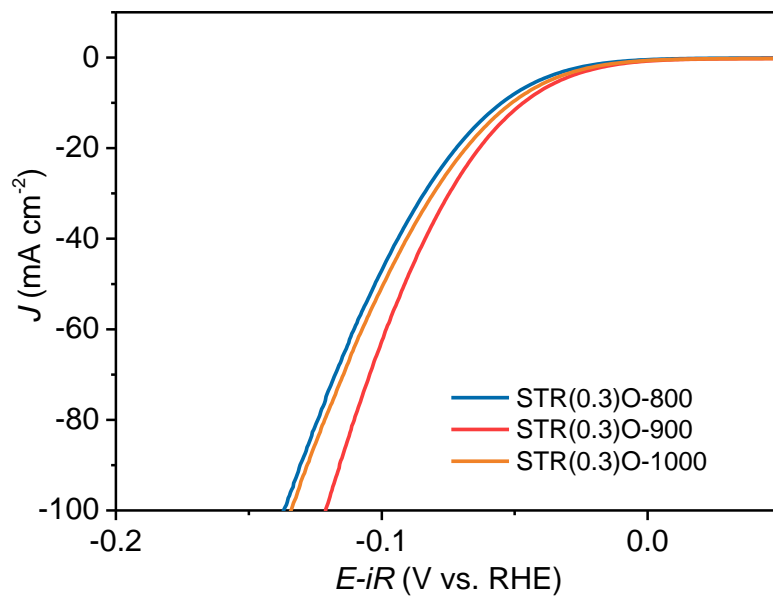

**Supplementary Figure 4.** Polarization curves of STRO samples at different calcination temperatures in Ar-saturated 1 M KOH solution at a scan rate of 5 mV s<sup>-1</sup>.

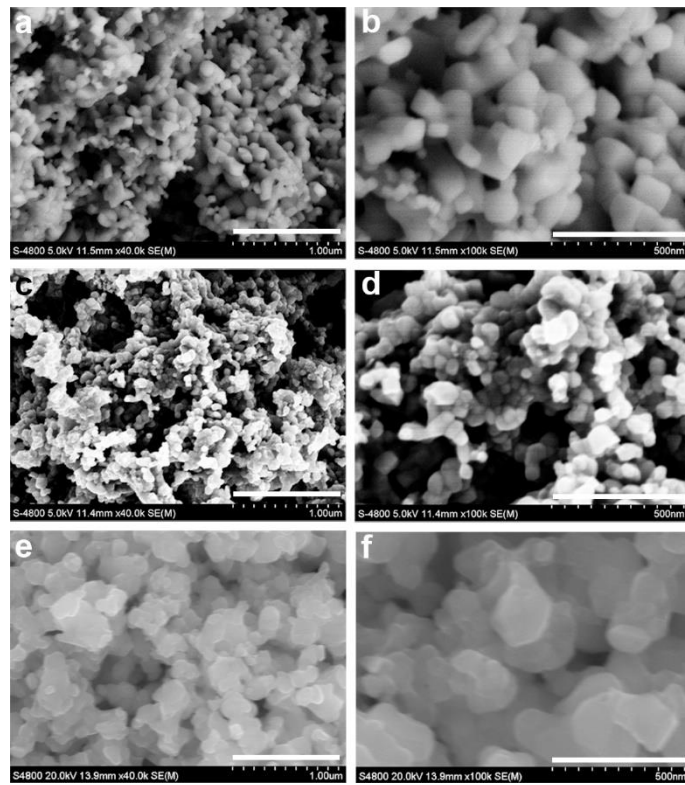

**Supplementary Figure 5.** SEM images with different magnifications. (a,b) STO, (c,d) STRO, and (e,f) SRO samples. Scale bar in (a,c,e) is 1  $\mu\text{m}$ , in (b,d,f) is 500 nm.

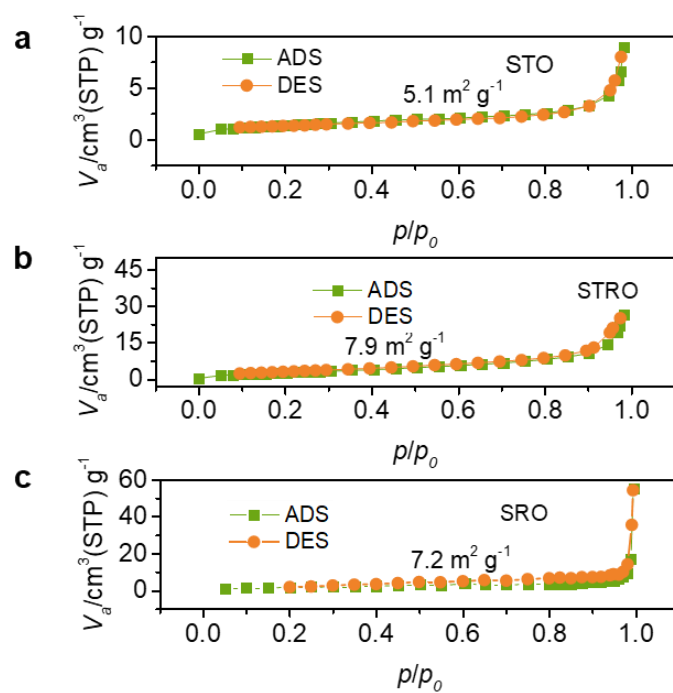

**Supplementary Figure 6.**  $\text{N}_2$  adsorption-desorption isotherm. (a) STO, (b) STRO and (c) SRO and the corresponding specific surface areas as estimated from Brunauer-Emmett-Teller (BET) measurements.

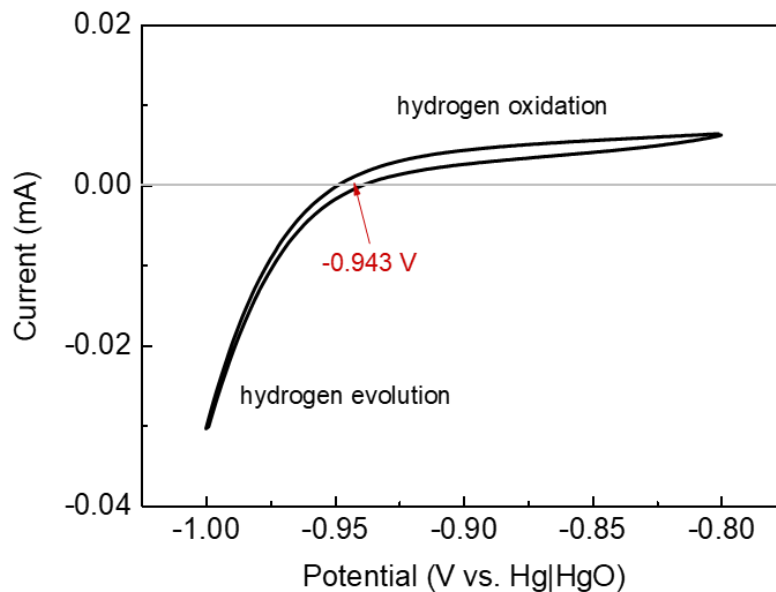

**Supplementary Figure 7.** RHE calibration of the Hg|HgO reference electrode in 1 M KOH. The calibration process was performed in a high purity H<sub>2</sub>-saturated 1 M KOH with a platinum RDE (PINE, 0.126 cm<sup>2</sup>) as the working electrode, Pt foil as the counter electrode, and Hg|HgO (1 M KOH) as the reference electrode. Cyclic voltammetry (CV) was conducted at a scan rate of 1 mV s<sup>-1</sup>, and the average of the two potentials at which the current crossed zero was taken as the thermodynamic potential for the hydrogen electrode reaction. In 1 M KOH solution,  $E_{\text{RHE}} = E_{\text{Hg|HgO}} + 0.943 \text{ V}$ .



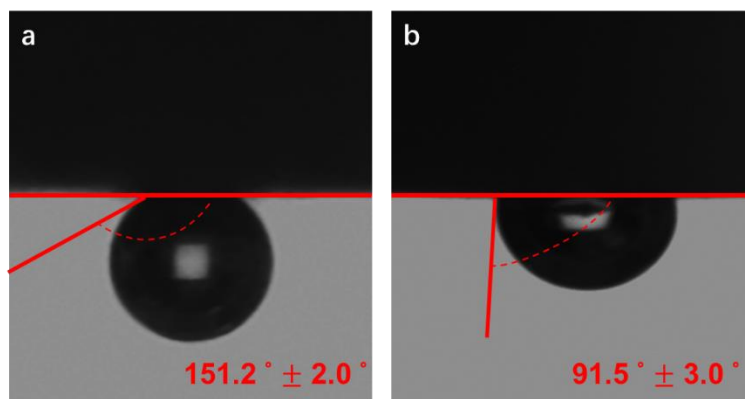

**Supplementary Figure 8.** The contact angle of hydrogen bubbles in 1 M KOH solution. (a) STRO and (b) Pt/C.

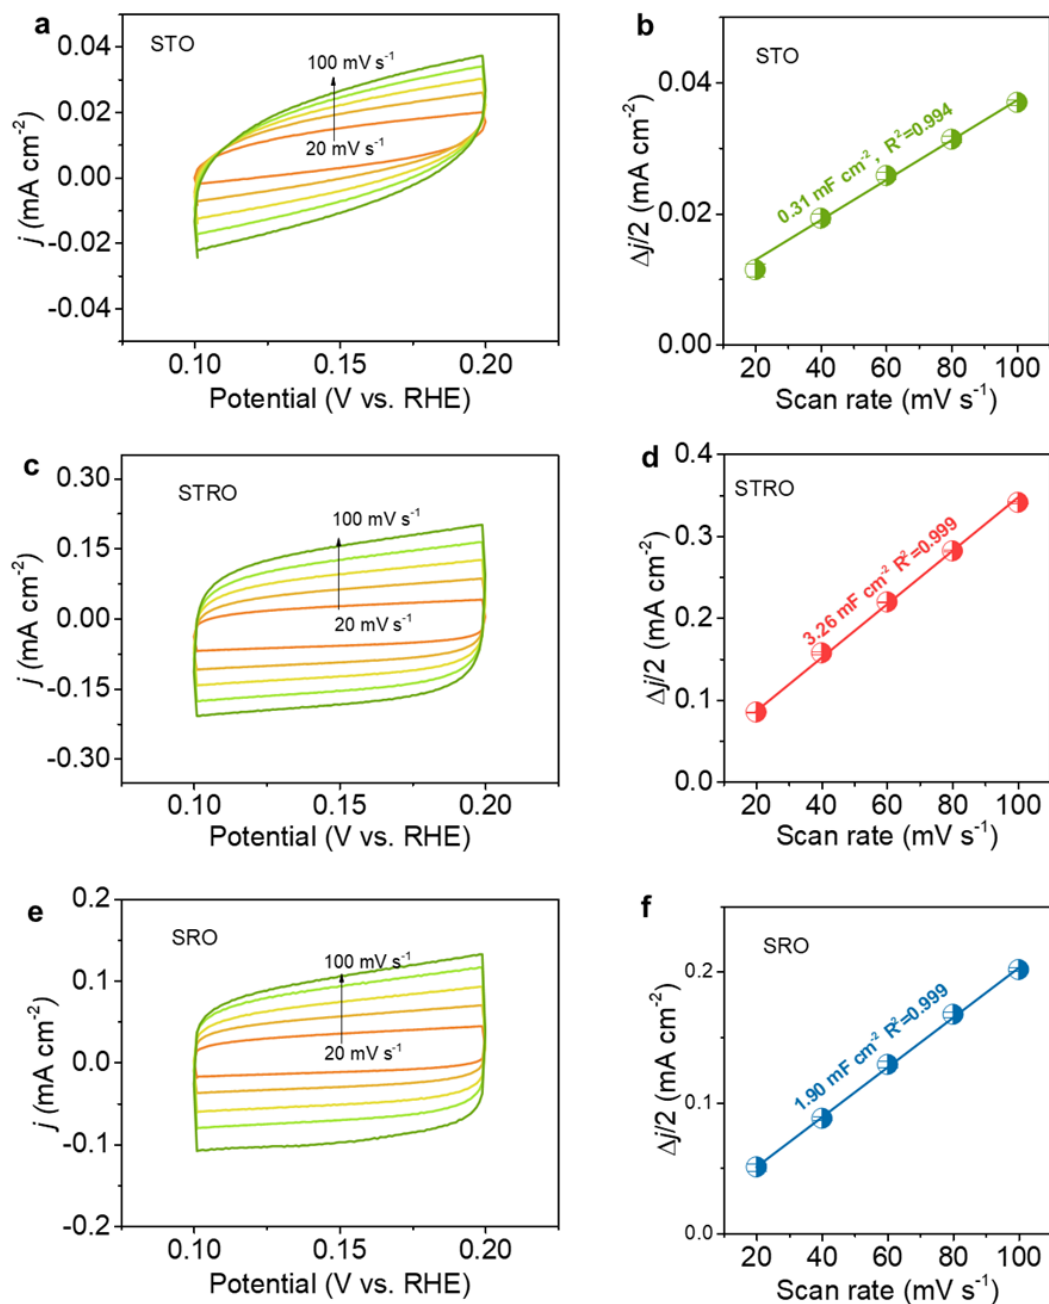

**Supplementary Figure 9.** ECSA estimation determined from  $C_{dl}$ . The  $C_{dl}$  obtained from a cyclic voltammetry (CV) method is expected to be linearly proportional to the ECSA<sup>1-3</sup>. CV measurements in a non-faradic current region (0.1-0.2 V vs. RHE, no  $iR$ -corrected) at scan rates of 20, 40, 60, 80 and 100  $\text{mV s}^{-1}$  of (a) STO, (c) STRO and (e) SRO catalysts in 1 M KOH. Linear fitting of the capacitive currents versus CV scan rates for (b) STO, (d) STRO and (f) SRO.

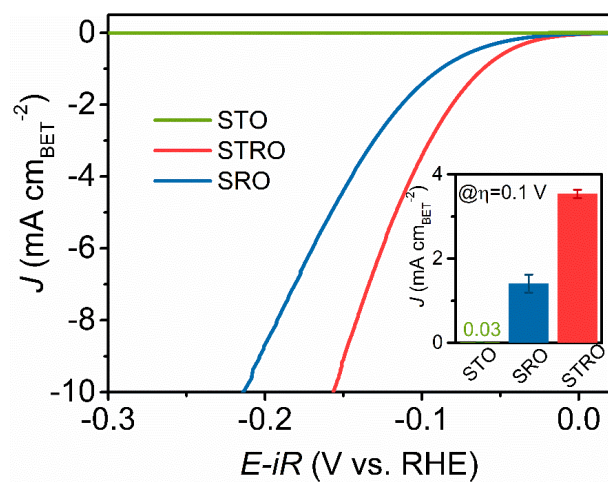

**Supplementary Figure 10.** Specific activity normalized to the real oxide surface area as a function of potential.

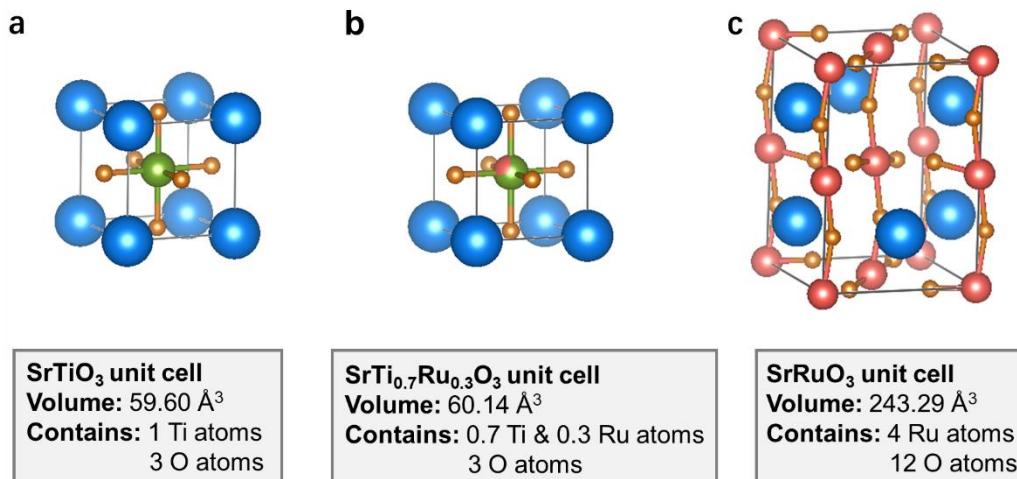

**Supplementary Figure 11.** Unit cell of catalysts. **(a)** STO, **(b)** STRO and **(c)** SRO unit cell. Detailed TOF calculations are given in Supplementary Note 1.

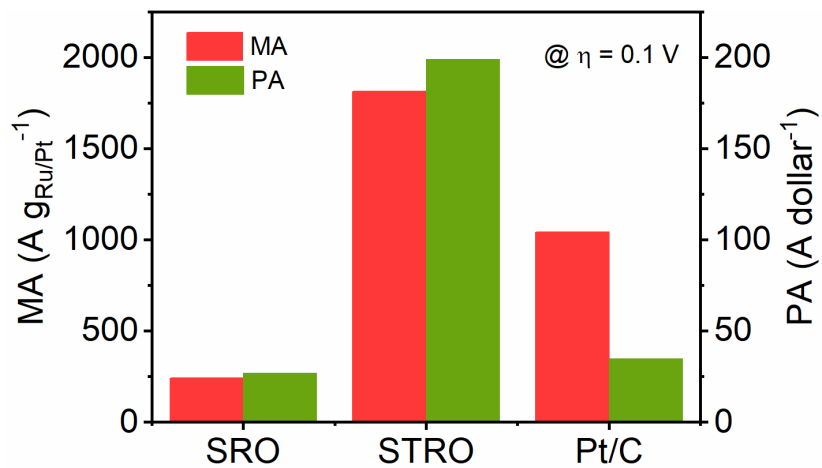

**Supplementary Figure 12.** Mass activity (MA) and price activity (PA) of SRO, STRO, and Pt/C at the overpotential of  $\eta = 0.1$  V.

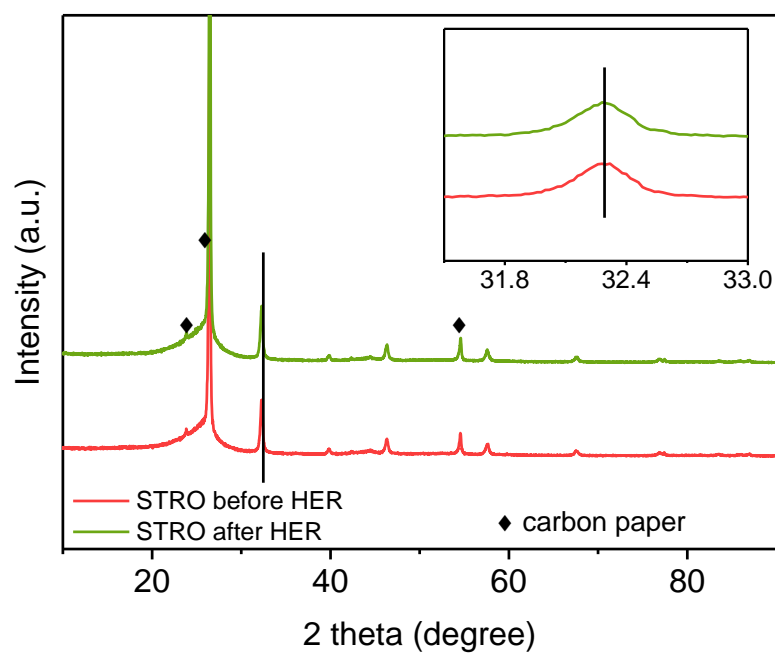

**Supplementary Figure 13.** XRD patterns of STRO before and after HER. The XRD patterns show that there is no apparent variation in the peak pattern and position of STRO before and after HER, confirming that the crystal structure of STRO does not change during HER.

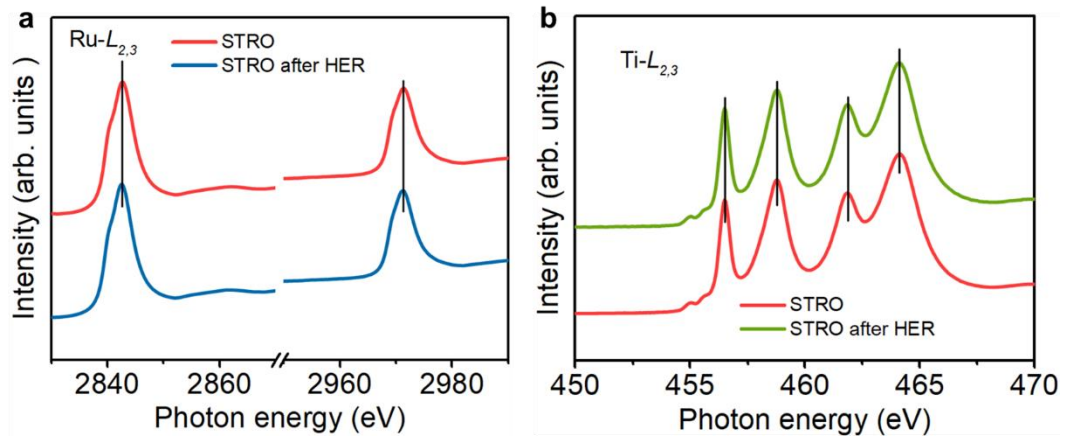

**Supplementary Figure 14.** XAS spectra. (a) Ru- $L_{2,3}$  and (b) Ti- $L_{2,3}$  for STRO before and after HER. The Ru- $L_{2,3}$  and Ti- $L_{2,3}$  spectra of STRO before and after HER show that there is no apparent variation, indicative of no electronic structure variation. The unchanged electronic structure therefore excludes the possibility of surface structure change during HER.

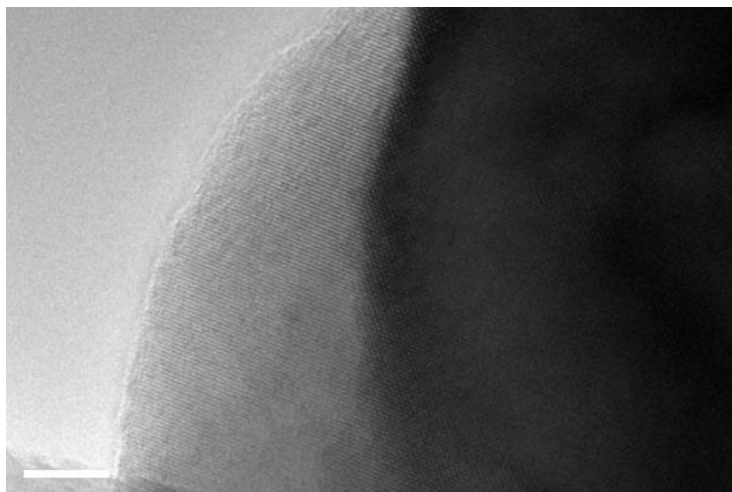

**Supplementary Figure 15.** TEM image of STRO after HER. Neither surface amorphization nor lattice change was observed, demonstrating the stability of crystal structure of STRO during HER. The scale bar is 5 nm.



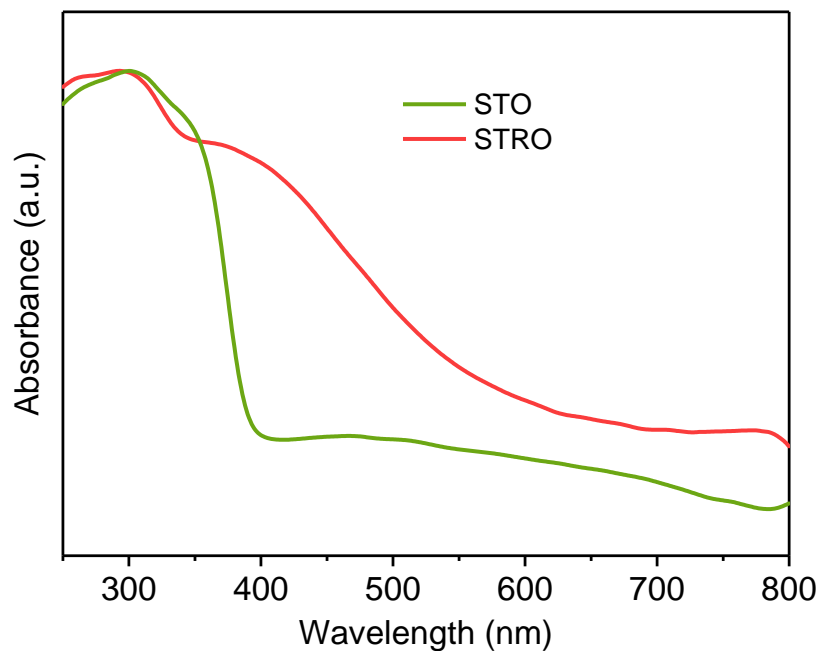

**Supplementary Figure 16.** The UV-vis spectroscopy of STO and STRO.

|                                                                                   |                                                                                   |                                                                                     |
|-----------------------------------------------------------------------------------|-----------------------------------------------------------------------------------|-------------------------------------------------------------------------------------|
| 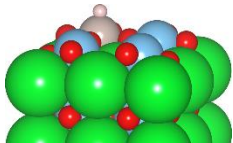 |  |  |
| H@Ru<br>$\Delta G_{H^*} = -0.29 \text{ eV}$                                       | H@O<br>$\Delta G_{H^*} = 0.06 \text{ eV}$                                         | H@O vacancy<br>$\Delta G_{H^*} = 0.05 \text{ eV}$                                   |

**Supplementary Figure 17.** Surface structural models and calculated sites of STRO for H\* adsorption.

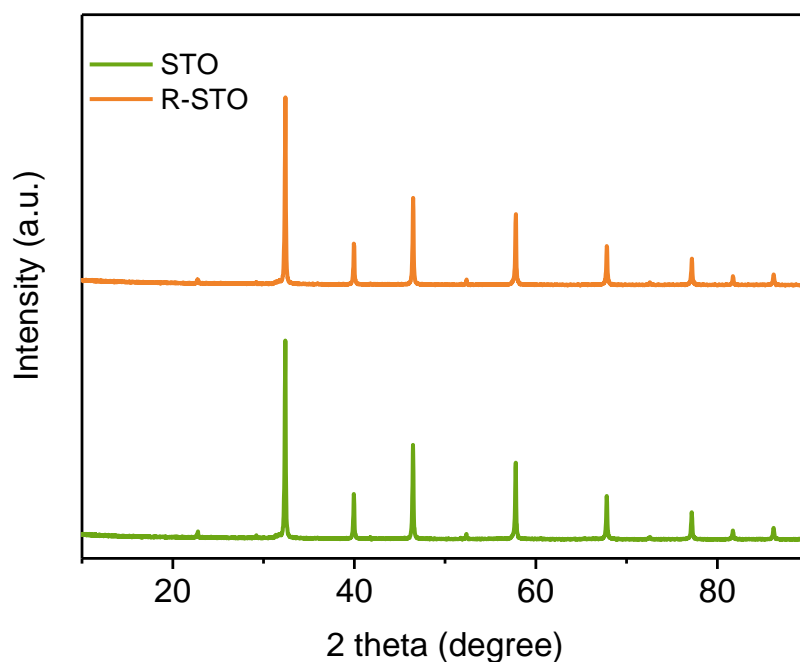

**Supplementary Figure 18.** XRD patterns of STO and R-STO. The R-STO was prepared by treating STO in a reductive atmosphere of 10% H<sub>2</sub>/90% Ar at 500 °C for 2h. The main peak of R-STO slightly shifts to a lower angle compared to the STO, implying the reduction of Ti oxidation state and generation of oxygen vacancies.

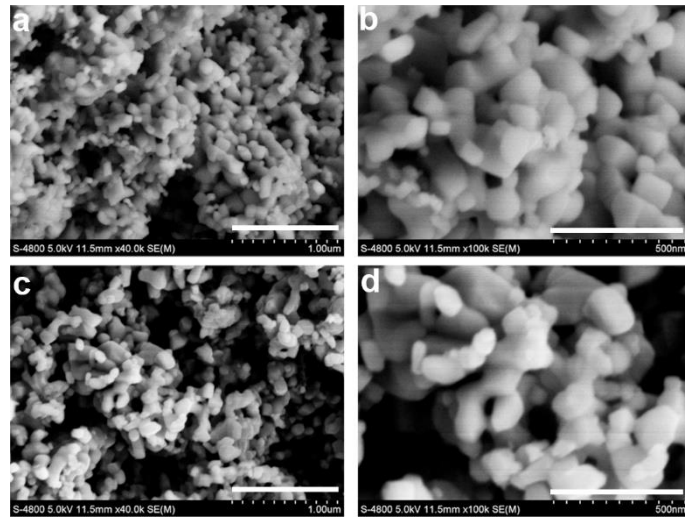

**Supplementary Figure 19.** SEM images with different magnifications. (a,b) STO and (c,d) R-STO samples. Scale bar in (a,c) is 1  $\mu\text{m}$ , in (b,d) is 500 nm.

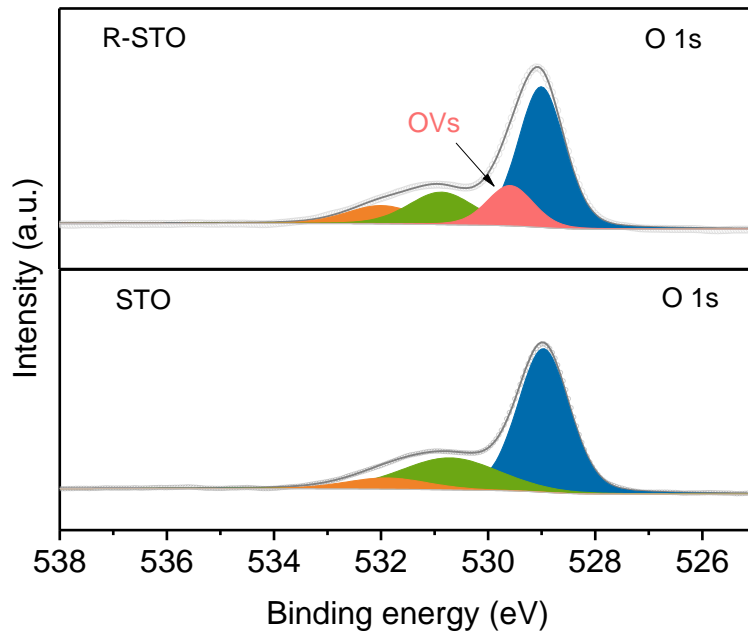

**Supplementary Figure 20.** The XPS spectra of O 1s for STO and R-STO. Much larger number of ( $\text{O}_2^{2-}/\text{O}^-$ ) species was observed for STO relative to R-STO, implying the significantly increased oxygen vacancies.

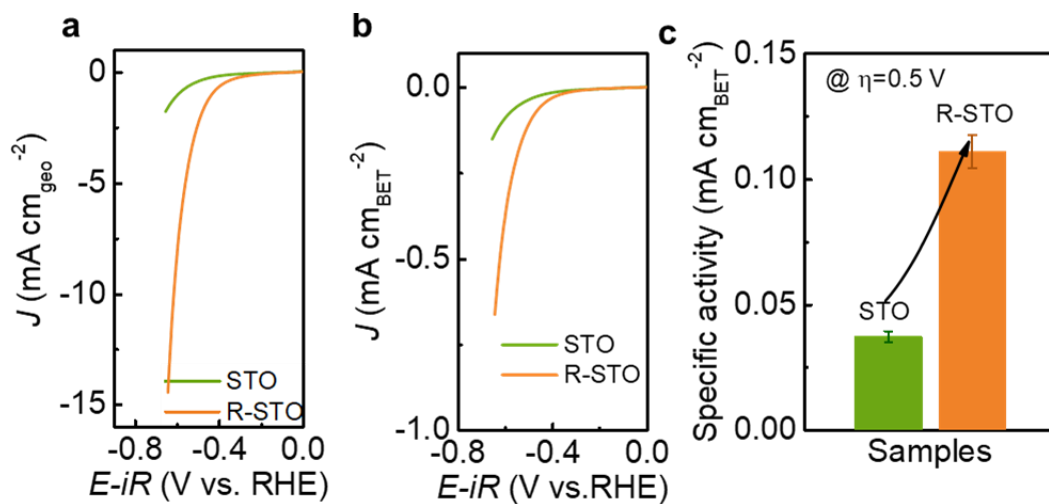

**Supplementary Figure 21.** HER activities. (a) HER electrode activity and (b,c) specific activity of STO and R-STO.

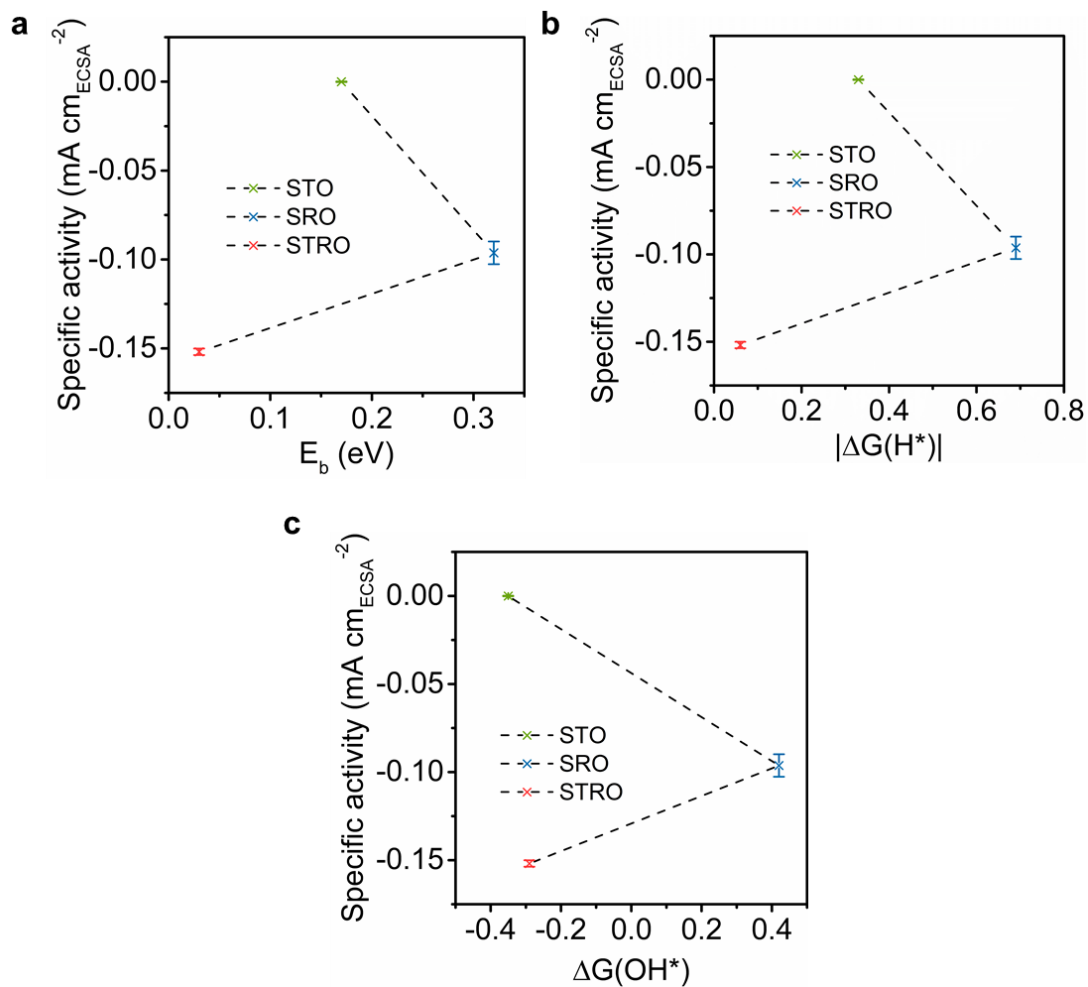

**Supplementary Figure 22.** Parameter-activity correlation. The relationship of (a) the kinetic reaction barriers ( $E_b$ ), (b) the absolute binding energy for hydrogen ( $|\Delta G_{H^*}|$ ), and (c) the hydroxide desorption energetics ( $\Delta G_{OH^*}$ ) with the specific activity of STO, STRO and SRO.

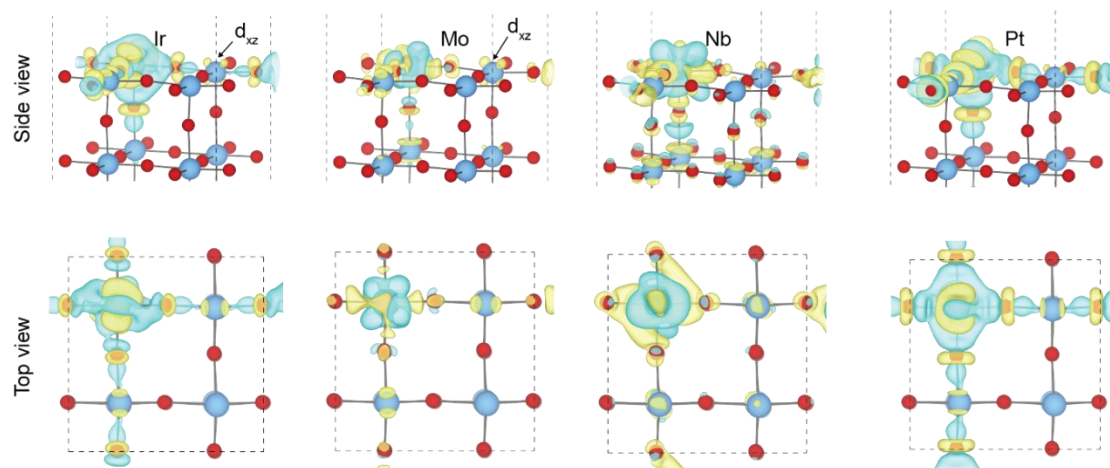

**Supplementary Figure 23.** Charge density redistribution upon the introduction of different metal dopants. From left to right: Ir, Mo, Nb and Pt.



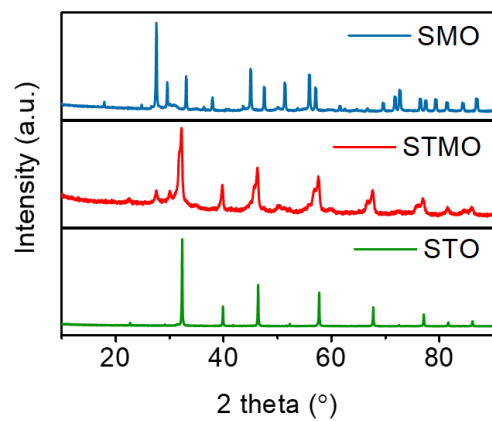

**Supplementary Figure 24.** XRD patterns of STO,  $\text{SrTi}_{0.7}\text{Mo}_{0.3}\text{O}_{3-\delta}$  (STMO), and  $\text{SrMoO}_4$  (SMO). Two weak peaks before the main peak of STMO could be indexed to the SMO.

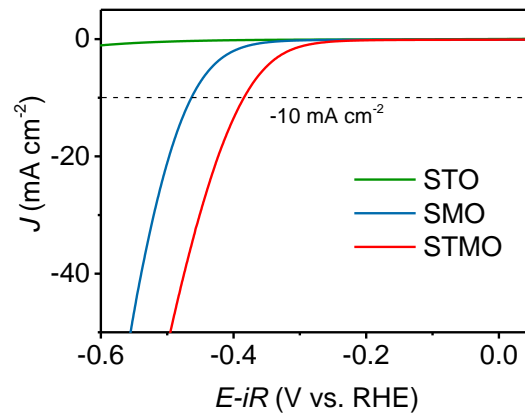

**Supplementary Figure 25.** Polarization curves of STO, STMO, and SMO catalysts in an Ar-saturated 1 M KOH solution. Scan rate,  $5 \text{ mV s}^{-1}$ .

**Supplementary Table 1.** The refined lattice parameters and reliability factors of STO, STRO and SRO samples.

| Sample | Phase type   | Space group  | Lattice parameters |        |        |      |      |      | R <sub>p</sub> (%) | R <sub>wp</sub> (%) | GOF  |
|--------|--------------|--------------|--------------------|--------|--------|------|------|------|--------------------|---------------------|------|
|        |              |              | a (Å)              | b (Å)  | c (Å)  | α(°) | β(°) | γ(°) |                    |                     |      |
| STO    | Cubic        | <i>Pm-3m</i> | 3.9061             | 3.9061 | 3.9061 | 90   | 90   | 90   | 7.47               | 9.70                | 1.64 |
| STRO   | Cubic        | <i>Pm-3m</i> | 3.9178             | 3.9178 | 3.9178 | 90   | 90   | 90   | 8.55               | 11.12               | 1.60 |
| SRO    | Orthorhombic | <i>Pnma</i>  | 5.5610             | 7.8674 | 5.5606 | 90   | 90   | 90   | 12.19              | 14.85               | 2.07 |

**Supplementary Table 2.** Summary of HER activity in alkaline media (1 M KOH) for various representative state-of-the-art catalysts, including metal oxides, synergistic hybrids, metal/alloy, single atoms, metal phosphides, metal sulfides, metal selenides, metal carbides, metal nitrides and functional carbon, etc.

| Catalysts                           | Substrate          | Mass loading (mg·cm <sup>-2</sup> ) | $\eta$ @10 mA cm <sup>-2</sup> (mV) | Tafel slope (mV dec <sup>-1</sup> ) | References        |
|-------------------------------------|--------------------|-------------------------------------|-------------------------------------|-------------------------------------|-------------------|
| STRO                                | Glass carbon       | 0.232                               | 46                                  | 40                                  | This work         |
| Metal oxides                        |                    |                                     |                                     |                                     |                   |
| Sr <sub>2</sub> RuO <sub>4</sub>    | Glass carbon       | 0.232                               | 61                                  | 51                                  | Ref <sup>4</sup>  |
| Gd <sub>0.5</sub>                   | Glass carbon       | 0.232                               | 210                                 | 29                                  | Ref <sup>5</sup>  |
| S-CoO NR                            | Carbon fiber paper | 0.486                               | 73                                  | 82                                  | Ref <sup>6</sup>  |
| 2-Cylce NiFeO <sub>x</sub>          | Carbon fiber paper | 1.6                                 | 88                                  | 150                                 | Ref <sup>7</sup>  |
| LBSCOF                              | Glass carbon       | 0.157                               | ~180                                | 44                                  | Ref <sup>8</sup>  |
| R-NCO                               | Ni foam            | 2.5                                 | 135                                 | 52                                  | Ref <sup>9</sup>  |
| Co <sub>3</sub> O <sub>4</sub> -MTA | Ni foam            | N.A. <sup>[a]</sup>                 | ~150                                | 98                                  | Ref <sup>10</sup> |
| NiCo <sub>2</sub> O <sub>4</sub>    | Ni foam            | ~1                                  | ~100                                | 50                                  | Ref <sup>11</sup> |
| 3D CoFeZr NS                        | Ni foam            | N.A.                                | 104                                 | 119                                 | Ref <sup>12</sup> |
| Ni/Zn doped CoO NR                  | Carbon fiber paper | 0.486                               | 53                                  | 47                                  | Ref <sup>13</sup> |
| SCFP                                | Ni foam            | 0.034                               | 110                                 | 94                                  | Ref <sup>14</sup> |
| Pr <sub>0.5</sub> BSCF              | Glass carbon       | 0.232                               | 237                                 | 45                                  | Ref <sup>15</sup> |
| P-Co <sub>3</sub> O <sub>4</sub>    | Ti mesh            | 0.4                                 | 120                                 | 52                                  | Ref <sup>16</sup> |
| SNCF-NR                             | Glass carbon       | 0.232                               | 232                                 | 103                                 | Ref <sup>3</sup>  |
| CuCoO                               | Ni foam            | 1.2                                 | 140                                 | 108                                 | Ref <sup>17</sup> |
| NiO NRs-m-Ov                        | Carbon fiber paper | 0.2                                 | 110                                 | 100                                 | Ref <sup>18</sup> |
| Synergistic hybrids                 |                    |                                     |                                     |                                     |                   |
| H <sub>2</sub> -CoCat               | FTO                | N.A.                                | >385                                | 140                                 | Ref <sup>19</sup> |
| LSC&MoSe <sub>2</sub>               | Glass carbon       | 0.385                               | ~250                                | 34                                  | Ref <sup>20</sup> |
| NiO@1T-MoS <sub>2</sub>             | Carbon fiber paper | 1.02                                | 46                                  | 52                                  | Ref <sup>21</sup> |
| PtNi/NiS NW                         | Glass carbon       | N.A.                                | 42                                  | N.A.                                | Ref <sup>22</sup> |

|                                              |                                     |       |     |      |                   |
|----------------------------------------------|-------------------------------------|-------|-----|------|-------------------|
| Pt NW/SL<br>-Ni(OH) <sub>2</sub>             | Glass<br>carbon                     | N.A.  | ~70 | N.A. | Ref <sup>23</sup> |
| Ni/NiO-CNT                                   | Glass<br>carbon                     | 0.28  | ~80 | 82   | Ref <sup>24</sup> |
| MoS <sub>2</sub> /NiCo-<br>LDH               | Carbon fiber<br>paper               | N.A.  | 78  | 77   | Ref <sup>25</sup> |
| Li <sub>x</sub> NiO/Ni                       | Glass<br>carbon                     | 0.6   | 36  | 50   | Ref <sup>26</sup> |
| NiO/PtNi                                     | Glass<br>carbon                     | ~0.06 | 40  | 79   | Ref <sup>27</sup> |
| MoP@NCHS                                     | Glass<br>carbon                     | 0.4   | 92  | 62   | Ref <sup>28</sup> |
| sc-Ni <sub>2</sub> P <sup>c</sup> -/NiHO     | Ni foam                             | N.A.  | 60  | 75   | Ref <sup>29</sup> |
| Mo <sub>3</sub> P/Mo NB                      | Glass<br>carbon                     | ~1.01 | 78  | 56   | Ref <sup>30</sup> |
| TiO <sub>2</sub> ND/Co<br>NSNT               | Carbon<br>fibers                    | 0.75  | 108 | 62   | Ref <sup>31</sup> |
| Ni <sub>5</sub> P <sub>4</sub> -Ru           | Glass<br>carbon                     | 0.142 | 54  | 52   | Ref <sup>32</sup> |
| MoS <sub>2</sub> /Ni(OH) <sub>2</sub>        | Glass<br>carbon                     | 0.285 | 185 | 73   | Ref <sup>33</sup> |
| Co <sub>0.85</sub> Se/NiFe-<br>LDH           | Exfoliated<br>graphene<br>(EG) foil | 4     | 260 | 160  | Ref <sup>34</sup> |
| Co/Co <sub>3</sub> O <sub>4</sub> NS         | Ni foam                             | 0.85  | 95  | 44   | Ref <sup>35</sup> |
| NiO@Ni/WS <sub>2</sub>                       | Carbon<br>cloth                     | N.A.  | 40  | 83   | Ref <sup>36</sup> |
| Ni <sub>3</sub> N/Pt                         | Ni mesh                             | 2     | 50  | 37   | Ref <sup>37</sup> |
| MoS <sub>2</sub> @NiO                        | Glass<br>carbon                     | 0.68  | 406 | 43   | Ref <sup>38</sup> |
| nPBA@<br>Co(OH) <sub>2</sub>                 | Ni foam                             | 3.1   | 258 | 46   | Ref <sup>39</sup> |
| NiFe/NiCo <sub>2</sub> O <sub>4</sub>        | Ni foam                             | N.A.  | 105 | 88   | Ref <sup>40</sup> |
| NiCo <sub>2</sub> O <sub>4</sub> /CuS        | Carbon fiber<br>paper               | 0.3   | 72  | 41   | Ref <sup>41</sup> |
| MnO/hcp Ni                                   | Glass<br>carbon                     | 2     | 80  | 68   | Ref <sup>42</sup> |
| 2D MoS <sub>2</sub> @<br>Co(OH) <sub>2</sub> | Glass<br>carbon                     | 0.2   | 89  | 53   | Ref <sup>43</sup> |
| β-Ni(OH) <sub>2</sub> /Pt                    | Glass<br>carbon                     | N.A.  | 115 | 42   | Ref <sup>44</sup> |
| MoSe <sub>2</sub> /SnS <sub>2</sub>          | Glass<br>carbon                     | 0.2   | 285 | 109  | Ref <sup>45</sup> |

|                                       |                    |       |      |      |                   |
|---------------------------------------|--------------------|-------|------|------|-------------------|
| Ni(OH) <sub>2</sub> @CuS              | Glass carbon       | 0.286 | 95   | 104  | Ref <sup>46</sup> |
| Ni(OH) <sub>2</sub> /MoS <sub>2</sub> | Carbon cloth       | N.A.  | 80   | 60   | Ref <sup>47</sup> |
| Pt-Co(OH) <sub>2</sub>                | Carbon cloth       | 6.9   | 32   | 70   | Ref <sup>48</sup> |
| Metals/alloys                         |                    |       |      |      |                   |
| Au-Ru-2 NW                            | Glass carbon       | 0.08  | 50   | 31   | Ref <sup>49</sup> |
| Ni-Mo-N                               | Carbon fiber cloth | 2.9   | 40   | 70   | Ref <sup>50</sup> |
| Ni-BDT-A                              | Carbon cloth       | 1     | 80   | 70   | Ref <sup>51</sup> |
| Ni-N0.19                              | Carbon fiber paper | N.A.  | 42   | 125  | Ref <sup>52</sup> |
| CoSn <sub>2</sub>                     | Ni foam            | N.A.  | 103  | 78   | Ref <sup>53</sup> |
| Pt <sub>3</sub> Ni <sub>3</sub> NW    | Glass carbon       | N.A.  | 50   | N.A. | Ref <sup>54</sup> |
| NiCu@C                                | Graphite plate     | 0.384 | 74   | 94   | Ref <sup>55</sup> |
| Ni <sub>3</sub> Fe@N-C NT/NF          | Glass carbon       | ~0.57 | 72   | 96   | Ref <sup>56</sup> |
| Cu-Ni-Al                              | Glass carbon       | N.A.  | 139  | 110  | Ref <sup>57</sup> |
| Ni42-300                              | N.A.               | N.A.  | 299  | ~117 | Ref <sup>58</sup> |
| Co@NG                                 | Glass carbon       | 0.47  | 220  | 112  | Ref <sup>59</sup> |
| MnNi                                  | Glass carbon       | 0.28  | 360  | N.A. | Ref <sup>60</sup> |
| NiMo NW                               | Ni foam            | 0.41  | 270  | 86   | Ref <sup>61</sup> |
| CuNi NC                               | Glass carbon       | N.A.  | 140  | 79   | Ref <sup>62</sup> |
| Single atoms                          |                    |       |      |      |                   |
| Co <sub>1</sub> /PCN                  | Glass carbon       | 0.5   | 89   | 59   | Ref <sup>63</sup> |
| Pt@PCM                                | Glass carbon       | N.A.  | ~150 | 74   | Ref <sup>64</sup> |
| Pt <sub>1</sub> /N-C                  | Glass carbon       | 0.25  | 46   | 37   | Ref <sup>65</sup> |
| Pt/np-Co <sub>0.85</sub> Se           | Glass carbon       | 2.04  | 58   | 39   | Ref <sup>66</sup> |
| Co <sub>1</sub> N <sub>x</sub> /C     | Glass carbon       | 2     | 247  | 75   | Ref <sup>67</sup> |

|                                                            |                    |       |      |      |                   |
|------------------------------------------------------------|--------------------|-------|------|------|-------------------|
| Co <sub>1</sub> /NG                                        | Glass carbon       | 0.285 | 270  | N.A. | Ref <sup>68</sup> |
| Mo <sub>1</sub> /N <sub>1</sub> C <sub>2</sub>             | Glass carbon       | 0.408 | 132  | 90   | Ref <sup>69</sup> |
| Metal phosphides                                           |                    |       |      |      |                   |
| Holey NiCoP NS                                             | Ni foam            | 1     | 58   | 57   | Ref <sup>70</sup> |
| CoP/NCNHP                                                  | Glass carbon       | ~0.39 | 115  | 66   | Ref <sup>71</sup> |
| CoP                                                        | Carbon cloth       | 0.92  | 209  | 129  | Ref <sup>72</sup> |
| RuP <sub>2</sub> @NPC                                      | Glass carbon       | 1     | 52   | 69   | Ref <sup>73</sup> |
| Ni <sub>3</sub> P <sub>4</sub>                             | Ni foil            | 25.8  | 150  | 53   | Ref <sup>74</sup> |
| Fe-CoP                                                     | Ti foil            | 1.03  | 78   | 75   | Ref <sup>75</sup> |
| CoMoP@C                                                    | Glass carbon       | 0.354 | 81   | 56   | Ref <sup>76</sup> |
| np-(Co <sub>0.52</sub> Fe <sub>0.48</sub> ) <sub>2</sub> P | N.A.               | 2.5   | 79   | 40   | Ref <sup>77</sup> |
| MoP                                                        | Glass carbon       | 0.86  | ~150 | 48   | Ref <sup>78</sup> |
| MoP@C                                                      | Carbon cloth       | 6     | 49   | 54   | Ref <sup>79</sup> |
| Zn <sub>x</sub> Co <sub>1-x</sub> P                        | Titanium mesh      | 1.52  | 67   | N.A. | Ref <sup>80</sup> |
| . Cu <sub>0.3</sub> Co <sub>2.7</sub> P/NC                 | Glass carbon       | 0.4   | 220  | 122  | Ref <sup>81</sup> |
| MoP/CNT                                                    | Carbon fiber paper | 0.5   | 86   | N.A. | Ref <sup>82</sup> |
| NiCoP/rGO                                                  | Carbon fiber paper | 0.15  | 209  | 124  | Ref <sup>83</sup> |
| Ni-P                                                       | Carbon paper       | N.A.  | 100  | ~85  | Ref <sup>84</sup> |
| CoP-MNA                                                    | Ni foam            | 6.2   | 54   | 51   | Ref <sup>85</sup> |
| Ce-doped CoP NW                                            | Ti plate           | 0.2   | 92   | 64   | Ref <sup>86</sup> |
| Ni <sub>2</sub> P-Cu <sub>3</sub> P                        | Porous NiCuC       | N.A.  | 78   | 173  | Ref <sup>87</sup> |
| Metal sulfides                                             |                    |       |      |      |                   |
| C-MoS <sub>2</sub>                                         | Carbon cloth       | N.A.  | 45   | 46   | Ref <sup>88</sup> |
| Cu ND/Ni <sub>3</sub> S <sub>2</sub> NT                    | Carbon fibers      | 0.52  | 128  | 76   | Ref <sup>89</sup> |

|                                                               |                    |       |      |      |                    |
|---------------------------------------------------------------|--------------------|-------|------|------|--------------------|
| Zn <sub>0.30</sub> Co <sub>0.70</sub> S <sub>4</sub>          | Glass carbon       | 0.285 | 85   | N.A. | Ref <sup>90</sup>  |
| Ni <sub>3</sub> S <sub>2</sub>                                | Ni foam            | 1.6   | 223  | N.A. | Ref <sup>91</sup>  |
| MoS <sub>2</sub> /Ni <sub>3</sub> S <sub>2</sub>              | Ni foam            | 9.7   | 110  | 83   | Ref <sup>92</sup>  |
| Ni-doped MoS <sub>2</sub>                                     | N.A.               | 0.89  | 98   | 60   | Ref <sup>93</sup>  |
| N-doped Ni <sub>3</sub> S <sub>2</sub><br>NS                  | Ni foam            | 0.59  | 155  | 133  | Ref <sup>94</sup>  |
| Ni <sub>0.33</sub> Co <sub>0.67</sub> S <sub>2</sub><br>NW    | Ti foil            | 0.3   | 88   | 118  | Ref <sup>95</sup>  |
| C, N-doped<br>NiPS <sub>3</sub>                               | Glass carbon       | 0.408 | 53   | 38   | Ref <sup>96</sup>  |
| NiCo <sub>2</sub> S <sub>4</sub>                              | Ni foam            | N.A.  | 80   | 59   | Ref <sup>97</sup>  |
| NiCo <sub>2</sub> S <sub>4</sub> NW                           | Ni foam            | N.A.  | 210  | 59   | Ref <sup>98</sup>  |
| Co-O-1T-<br>MoS <sub>2</sub> /SWNT                            | Glass carbon       | N.A.  | 113  | 50   | Ref <sup>99</sup>  |
| V-doped NiS <sub>2</sub><br>NS                                | Glass carbon       | 0.272 | 110  | 90   | Ref <sup>100</sup> |
| a-Ni <sub>3</sub> S <sub>2</sub> @NPC                         | Cu film            | N.A.  | 61   | 68   | Ref <sup>101</sup> |
| Metal selenides                                               |                    |       |      |      |                    |
| o-CoSe <sub>2</sub>  P                                        | Glass carbon       | 1.02  | 104  | 69   | Ref <sup>102</sup> |
| Li-IrSe <sub>2</sub>                                          | Carbon fiber paper | 0.25  | 72   | N.A. | Ref <sup>103</sup> |
| Tubular CoSe <sub>2</sub><br>NS                               | Ni foam            | N.A.  | 79   | 84   | Ref <sup>104</sup> |
| NiSe                                                          | Ni foam            | 2.8   | 96   | 120  | Ref <sup>105</sup> |
| Ni <sub>0.89</sub> Co <sub>0.11</sub> Se <sub>2</sub><br>MNSN | Ni foam            | 2.62  | 85   | 52   | Ref <sup>106</sup> |
| c-CoSe <sub>2</sub>                                           | Carbon cloth       | 0.5   | 200  | 85   | Ref <sup>107</sup> |
| SWCNT/MoSe                                                    | Glass carbon       | 2     | 63   | 63   | Ref <sup>108</sup> |
| Metal carbides                                                |                    |       |      |      |                    |
| MoC <sub>x</sub> NO                                           | Glass carbon       | 0.8   | 151  | 59   | Ref <sup>109</sup> |
| Mo <sub>2</sub> C                                             | Carbon paste       | 0.8   | ~190 | 54   | Ref <sup>110</sup> |
| Fe <sub>3</sub> C@NCNT                                        | N.A.               | N.A.  | 154  | N.A. | Ref <sup>111</sup> |
| N@MoPC <sub>x</sub> NS                                        | Glass carbon       | 0.14  | 139  | 87   | Ref <sup>112</sup> |
| Mo <sub>2</sub> C/N-doped C                                   | Glass carbon       | 0.28  | 100  | 65   | Ref <sup>113</sup> |



|                                             |                 |       |      |      |                    |
|---------------------------------------------|-----------------|-------|------|------|--------------------|
| N,P-doped<br>Mo <sub>2</sub> C@carbon<br>NP | Glass<br>carbon | 0.9   | 50   | 71   | Ref <sup>114</sup> |
| Mo <sub>2</sub> C/CLCN                      | Glass<br>carbon | 0.357 | ~200 | 55   | Ref <sup>109</sup> |
| Metal nitrides                              |                 |       |      |      |                    |
| CoN <sub>x</sub> /C                         | Glass<br>carbon | 2     | 170  | 75   | Ref <sup>68</sup>  |
| NiCoN/C                                     | Glass<br>carbon | 0.2   | 130  | N.A. | Ref <sup>116</sup> |
| Co-Ni <sub>3</sub> N                        | Carbon<br>cloth | 2.91  | 194  | 156  | Ref <sup>117</sup> |
| NiMoN                                       | Carbon<br>cloth | ~1.1  | 109  | 95   | Ref <sup>118</sup> |
| Ni <sub>3</sub> N@CQD                       | Glass<br>carbon | 0.18  | 69   | 108  | Ref <sup>119</sup> |
| Functional carbon materials                 |                 |       |      |      |                    |
| C <sub>3</sub> N <sub>4</sub> @NG           | Glass<br>carbon | 0.1   | >600 | N.A. | Ref <sup>120</sup> |
| ONPPGC                                      | Carbon<br>cloth | 0.1   | 446  | 154  | Ref <sup>121</sup> |
| N, S-CN                                     | Glass<br>carbon | N.A.  | 380  | 103  | Ref <sup>122</sup> |

[a]: N. A.=Not available

**Supplementary Table 3.** Results of Bader charge analysis.

| Samples | Atoms | Charges ( e ) |
|---------|-------|---------------|
| STO     | Ti    | +2.2          |
| SRO     | Ru    | +1.51         |
| STRO    | Ti    | +2.1          |
|         | Ru    | +1.84         |

**Supplementary Table 4.** O 1s XPS peak deconvolution results of STO and STRO.

| Electrocatalysts | Lattice O <sup>2-</sup> | O <sub>2</sub> <sup>2-</sup> /O <sup>-</sup> | -OH or O <sub>2</sub> | H <sub>2</sub> O or CO <sub>3</sub> <sup>2-</sup> |
|------------------|-------------------------|----------------------------------------------|-----------------------|---------------------------------------------------|
| STO              | 64.56%                  | /                                            | 27.39%                | 8.05%                                             |
| STRO             | 41.07%                  | 19.17%                                       | 31.37%                | 8.39%                                             |

**Supplementary Table 5.** Evaluation of STO, STRO and SRO catalysts based on four main key factors affecting the alkaline HER activity.

|      |            | Electronic conductivity | Water dissociation | OH desorption | H adsorption |
|------|------------|-------------------------|--------------------|---------------|--------------|
| STO  |            | ×                       | √                  | ×             | ×            |
| SRO  |            | √                       | ×                  | √             | ×            |
| STRO | Ti site    | √                       | √                  | ×             | √            |
|      | Ru site    | √                       | ×                  | √             | √            |
|      | Ti+Ru site | √                       | √ (on Ti)          | √ (on Ru)     | √            |

Note: √ means favorable; × means unfavorable.

## Supplementary Note 1. Turnover frequency calculations

To calculate the per-site turnover frequency (TOF), we used the Supplementary Equation 1:

$$\text{TOF} = \frac{\text{\#number of total hydrogen turnovers/cm}_{\text{geo}}^2}{\text{\#number of active sites/cm}_{\text{geo}}^2} \quad (1)$$

The total number of hydrogen turnovers was calculated from the current density according to the Supplementary Equation 2:

No. of H<sub>2</sub>=

$$\left( j \frac{\text{mA}}{\text{cm}_{\text{geo}}^2} \right) \left( \frac{1 \text{ C s}^{-1}}{1000 \text{ mA}} \right) \left( \frac{1 \text{ mol e}^{-1}}{96485.3 \text{ C}} \right) \left( \frac{1 \text{ mol H}_2}{2 \text{ mol e}^{-1}} \right) \left( \frac{6.022 \times 10^{23} \text{ H}_2 \text{ molecules}}{1 \text{ mol H}_2} \right) = 3.12 \times 10^{15} \frac{\text{H}_2 \text{ s}^{-1}}{\text{cm}_{\text{geo}}^2} \text{ per } \frac{\text{mA}}{\text{cm}_{\text{geo}}^2} \quad (2)$$

We estimate the number of active sites as the number of surface active oxygen sites (as to be confirmed by the following calculations with H\* more easily adsorbing in O than Ru) from the unit cell of the STO, STRO and SRO crystal structure. The active sites per real surface area are calculated from the Supplementary Equations 3:

$$\text{No. of active sites} = \left( \frac{\text{No. of atoms/unit cell}}{\text{No. of atoms/unit cell}} \right)^{\frac{2}{3}} \quad (3)$$

From Figure S10 we can calculate the number of active sites per real surface area for STO, STRO and SRO:

$$\text{No. of active sites (STO)} = \left( \frac{\frac{3 \text{ unit cell}}{\text{unit}}}{59.60 \frac{\text{\AA}^3}{\text{unit cell}}} \right)^{\frac{2}{3}} = 1.361 \times 10^{15} \text{ atoms cm}_{\text{real}}^{-2} \quad (4)$$

$$\text{No. of active sites (STRO)} = \left( \frac{\frac{3 \text{ unit cell}}{\text{unit}}}{60.14 \frac{\text{\AA}^3}{\text{unit cell}}} \right)^{\frac{2}{3}} = 1.355 \times 10^{15} \text{ atoms cm}_{\text{real}}^{-2} \quad (5)$$

$$\text{No. of active sites (SRO)} = \left( \frac{\frac{12 \text{ unit cell}}{\text{unit}}}{243.29 \frac{\text{\AA}^3}{\text{unit cell}}} \right)^{\frac{2}{3}} = 1.345 \times 10^{15} \text{ atoms cm}_{\text{real}}^{-2} \quad (6)$$

The real surface area for HER is calculated from the electrochemical active surface area (ECSA), which can be converted from the specific capacitance. The specific capacitance for a flat surface is generally found to be in the range of 20-60 μF cm<sub>geo</sub><sup>2</sup>.

In the following calculations of TOF we assume an average of 40 μF cm<sub>geo</sub><sup>2</sup> for STO, STRO and SRO<sup>123, 124</sup>.

$$A_{\text{ECSA}} = \frac{\text{specific capacitance}}{40 \mu\text{F cm}_{\text{geo}}^2 \text{ per cm}_{\text{ECSA}}^2} \quad (7)$$

From Figure S8 we can calculate ECSA according to the Supplementary Equation 7 for STO, STRO and SRO:

$$A_{\text{ECSA}}(\text{STO}) = \frac{0.31 \text{ mF}/0.196 \text{ cm}_{\text{geo}}^2}{40 \mu\text{F cm}_{\text{geo}}^2 \text{ per cm}_{\text{ECSA}}^2} = 39.5 \text{ cm}_{\text{ECSA}}^2 \quad (8)$$

$$A_{\text{ECSA}}(\text{STRO}) = \frac{3.26 \text{ mF}/0.196 \text{ cm}_{\text{geo}}^2}{40 \mu\text{F cm}_{\text{geo}}^2 \text{ per cm}_{\text{ECSA}}^2} = 415.8 \text{ cm}_{\text{ECSA}}^2 \quad (9)$$

$$A_{\text{ECSA}}(\text{SRO}) = \frac{1.90 \text{ mF} / 0.196 \text{ cm}_{\text{geo}}^2}{40 \mu\text{F cm}_{\text{geo}}^2 \text{ per cm}_{\text{ECSA}}^2} = 242.3 \text{ cm}_{\text{ECSA}}^2 \quad (10)$$

Finally, the plot of current density can be converted into a TOF plot according to the Supplementary Equation 11:

$$\text{TOF} = \frac{3.12 \times 10^{15} \frac{\text{H}_2 \text{ s}^-}{\text{cm}_{\text{geo}}^2} \text{ per } \frac{\text{mA}}{\text{cm}_{\text{geo}}^2} \times |j|}{\text{No. of active sites} \times A_{\text{ECSA}}} \quad (11)$$

## Supplementary Note 2. Free energy calculations

Free energies were calculated according to the Supplementary Equation 12:

$$\Delta G_X = \Delta E_X + \Delta ZPE - T\Delta S \quad (12)$$

Where  $\Delta E$  is the binding energy of the intermediate  $X$  ( $X = \text{H}^*, \text{H}^* - \text{OH}^*, \text{OH}^*$  and  $\text{H}_2\text{O}^*$ ),  $\Delta ZPE$  and  $T\Delta S$  are the zero-point energy and entropic contributions at room temperature. The adsorption energies are calculated with respect to  $\text{H}_2$  and  $\text{H}_2\text{O}$ , which are taken as reference and their energies are obtained from DFT calculations.

More specifically, the binding energy of  $\text{H}^*$  is obtained according to the Supplementary Equation 13:

$$\Delta E_{\text{H}^*} = E_{\text{H}^*} - E_* - \frac{1}{2}E_{\text{H}_2} \quad (13)$$

Where  $E_{\text{H}^*}$ ,  $E_*$  and  $E_{\text{H}_2}$  are the energies of the  $\text{H}^*$  intermediate, the bare surface and the energy of a  $\text{H}_2$  molecule, respectively. The binding of  $\text{H}^*-\text{OH}^*$  is obtained via the Supplementary Equation 14:

$$\Delta E_{\text{H}^*-\text{OH}^*} = E_{\text{H}^*-\text{OH}^*} - E_* - E_{\text{H}_2\text{O}} \quad (14)$$

Where  $E_{\text{H}^*-\text{OH}^*}$  and  $E_{\text{H}_2\text{O}}$  are the energies of the  $\text{H}^*-\text{OH}^*$  intermediate (dissociated water molecule) and the energy of a water molecule, respectively.

Finally, the  $\text{OH}^*$  binding energy is calculated according to the Supplementary Equation 15:

$$\Delta E_{\text{H}^*-\text{OH}^*} = E_{\text{OH}^*} - E_* - E_{\text{H}_2\text{O}} + \frac{1}{2}E_{\text{H}_2} \quad (15)$$

With  $E_{\text{OH}^*}$  being the total DFT energy of the  $\text{OH}^*$  intermediate.

The alkaline HER mechanism involves the adsorption and dissociation of  $\text{H}_2\text{O}$  on the surface of the catalyst, followed by the release of  $\text{OH}^-$  and the subsequent combination of  $\text{H}^*$  with a water molecule (or an adsorbed  $\text{H}^*$ ) to release  $\text{H}_2$ .

Under the Heyrovsky mechanism the overall reaction is:

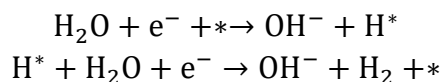

Calculating the free energy of  $\text{OH}^-$  in solution can be avoided by assuming that the free energies of the above two equations are the same at equilibrium potential of HER.

The equation can be broken down into:

$$G_0 = G_* + G_{\text{H}_2\text{O}} \quad (16)$$

$$G_1 = G_{\text{H}^*-\text{OH}^*} \quad (17)$$

$$G_2 = G_{\text{H}^*} + G_{\text{OH}^-} \quad (18)$$

$$G_3 = G_* + G_{\text{OH}^-} + \frac{1}{2}G_{\text{H}_2} \quad (19)$$

With  $G_0 = G_3$ . Hence the reaction energy profile can be constructed by considering the free energy changes using the total free energies defined above. This gives:  $\Delta G_{\text{H}^*-\text{OH}^*} = G_1 - G_0$  for the Volmer step, while the activity of the Heyrovsky step is described using  $\Delta G_{\text{H}^*} = G_2 - G_3$ .

## Supplementary References:

1. McCrory, C. C. L., Jung, S., Peters, J. C. & Jaramillo, T. F. Benchmarking heterogeneous electrocatalysts for the oxygen evolution reaction. *J. Am. Chem. Soc.* **135**, 16977-16987 (2013).
2. Yin, Y. *et al.* Synergistic phase and disorder engineering in 1T-MoSe<sub>2</sub> nanosheets for enhanced hydrogen-evolution reaction. *Adv. Mater.* **29**, 1700311 (2017).
3. Zhu, Y. *et al.* A perovskite nanorod as bifunctional electrocatalyst for overall water splitting. *Adv. Energy Mater.* **7**, 1602122 (2017).
4. Zhu, Y. *et al.* Unusual synergistic effect in layered Ruddlesden–Popper oxide enables ultrafast hydrogen evolution. *Nat. Commun.* **10**, 149 (2019).
5. Guan, D. *et al.* Screening highly active perovskites for hydrogen-evolving reaction via unifying ionic electronegativity descriptor. *Nat. Commun.* **10**, 3755 (2019).
6. Ling, T. *et al.* Activating cobalt(II) oxide nanorods for efficient electrocatalysis by strain engineering. *Nat. Commun.* **8**, 1509 (2017).
7. Wang, H. *et al.* Bifunctional non-noble metal oxide nanoparticle electrocatalysts through lithium-induced conversion for overall water splitting. *Nat. Commun.* **6**, 7261 (2015).
8. Hua, B. *et al.* Activating p-Blocking Centers in Perovskite for Efficient Water Splitting. *Chem* **4**, 2902-2916 (2018).
9. Peng, S. *et al.* Necklace-like multishelled hollow spinel oxides with oxygen vacancies for efficient water electrolysis. *J. Am. Chem. Soc.* **140**, 13644-13653 (2018).
10. Zhu, Y. P., Ma, T. Y., Jaroniec, M. & Qiao, S. Z. Self-templating synthesis of hollow Co<sub>3</sub>O<sub>4</sub> microtube arrays for highly efficient water electrolysis. *Angew. Chem. Int. Ed.* **56**, 1324-1328 (2017).
11. Gao, X. *et al.* Hierarchical NiCo<sub>2</sub>O<sub>4</sub> hollow microcuboids as bifunctional electrocatalysts for overall water-splitting. *Angew. Chem. Int. Ed.* **55**, 6290-6294 (2016).
12. Huang, L. *et al.* Zirconium-regulation-induced bifunctionality in 3D cobalt–iron oxide nanosheets for overall water splitting. *Adv. Mater.* **31**, 1901439 (2019).
13. Ling, T. *et al.* Well-dispersed nickel- and zinc-tailored electronic structure of a transition metal oxide for highly active alkaline hydrogen evolution reaction. *Adv. Mater.* **31**, 1807771 (2019).
14. Chen, G. *et al.* A universal strategy to design superior water-splitting electrocatalysts based on fast in situ reconstruction of amorphous nanofilm precursors. *Adv. Mater.* **30**, 1804333 (2018).
15. Xu, X. *et al.* A perovskite electrocatalyst for efficient hydrogen evolution reaction. *Adv. Mater.* **28**, 6442-6448 (2016).
16. Xiao, Z. *et al.* Filling the oxygen vacancies in Co<sub>3</sub>O<sub>4</sub> with phosphorus: an ultra-efficient electrocatalyst for overall water splitting. *Energy Environ. Sci.* **10**, 2563-2569 (2017).
17. Kuang, M., Han, P., Wang, Q., Li, J. & Zheng, G. CuCo hybrid oxides as bifunctional electrocatalyst for efficient water splitting. *Adv. Funct. Mater.* **26**, 8555-8561 (2016).



18. Zhang, T. *et al.* Engineering oxygen vacancy on NiO nanorod arrays for alkaline hydrogen evolution. *Nano Energy* **43**, 103-109 (2018).
19. Cobo, S. *et al.* A Janus cobalt-based catalytic material for electro-splitting of water. *Nat. Mater.* **11**, 802-807 (2012).
20. Oh, N. K. *et al.* In-situ local phase-transitioned MoSe<sub>2</sub> in La<sub>0.5</sub>Sr<sub>0.5</sub>CoO<sub>3-δ</sub> heterostructure and stable overall water electrolysis over 1000 hours. *Nat. Commun.* **10**, 1723 (2019).
21. Huang, Y. *et al.* Atomically engineering activation sites onto metallic 1T-MoS<sub>2</sub> catalysts for enhanced electrochemical hydrogen evolution. *Nat. Commun.* **10**, 982 (2019).
22. Wang, P. *et al.* Precise tuning in platinum-nickel/nickel sulfide interface nanowires for synergistic hydrogen evolution catalysis. *Nat. Commun.* **8**, 14580 (2017).
23. Yin, H. *et al.* Ultrathin platinum nanowires grown on single-layered nickel hydroxide with high hydrogen evolution activity. *Nat. Commun.* **6**, 6430 (2015).
24. Gong, M. *et al.* Nanoscale nickel oxide/nickel heterostructures for active hydrogen evolution electrocatalysis. *Nat. Commun.* **5**, 4695 (2014).
25. Hu, J. *et al.* Nanohybridization of MoS<sub>2</sub> with layered double hydroxides efficiently synergizes the hydrogen evolution in alkaline media. *Joule* **1**, 383-393 (2017).
26. Lu, K. *et al.* Li<sub>x</sub>NiO/Ni heterostructure with strong basic lattice oxygen enables electrocatalytic hydrogen evolution with Pt-like activity. *J. Am. Chem. Soc.* **142**, 12613-12619 (2020).
27. Zhao, Z. *et al.* Surface-engineered PtNi-O nanostructure with record-high performance for electrocatalytic hydrogen evolution reaction. *J. Am. Chem. Soc.* **140**, 9046-9050 (2018).
28. Zhao, D. *et al.* Synergistically interactive pyridinic-N–MoP sites: identified active centers for enhanced hydrogen evolution in alkaline solution. *Angew. Chem. Int. Ed.* **59**, 8982-8990 (2020).
29. You, B., Zhang, Y., Jiao, Y., Davey, K. & Qiao, S. Z. Negative charging of transition-metal phosphides via strong electronic coupling for destabilization of alkaline water. *Angew. Chem. Int. Ed.* **58**, 11796-11800 (2019).
30. Li, F. *et al.* Construction of porous Mo<sub>3</sub>P/Mo nanobelts as catalysts for efficient water splitting. *Angew. Chem. Int. Ed.* **57**, 14139-14143 (2018).
31. Feng, J. X., Xu, H., Dong, Y. T., Lu, X. F., Tong, Y. X. & Li, G. R. Efficient hydrogen evolution electrocatalysis using cobalt nanotubes decorated with titanium dioxide nanodots. *Angew. Chem. Int. Ed.* **56**, 2960-2964 (2017).
32. He, Q. *et al.* Achieving efficient alkaline hydrogen evolution reaction over a Ni<sub>5</sub>P<sub>4</sub> catalyst incorporating single-atomic Ru sites. *Adv. Mater.* **32**, 1906972 (2020).
33. Zhu Z, *et al.* Ultrathin transition metal dichalcogenide/3d metal hydroxide hybridized nanosheets to enhance hydrogen evolution activity. *Adv. Mater.* **30**, 1801171 (2018).
34. Hou, Y., Lohe, M. R., Zhang, J., Liu, S., Zhuang, X. & Feng, X. Vertically oriented cobalt selenide/NiFe layered-double-hydroxide nanosheets supported on exfoliated graphene foil: an efficient 3D electrode for overall water splitting. *Energy Environ. Sci.* **9**, 478-483 (2016).

35. Yan, X., Tian, L., He, M. & Chen, X. Three-dimensional crystalline/amorphous Co/Co<sub>3</sub>O<sub>4</sub> core/shell nanosheets as efficient electrocatalysts for the hydrogen evolution reaction. *Nano Lett.* **15**, 6015-6021 (2015).
36. Wang, D., Li, Q., Han, C., Xing, Z. & Yang, X. When NiO@Ni meets WS<sub>2</sub> nanosheet array: a highly efficient and ultrastable electrocatalyst for overall water splitting. *ACS Cent. Sci.* **4**, 112-119 (2018).
37. Wang, Y., Chen, L., Yu, X., Wang, Y. & Zheng, G. Superb alkaline hydrogen evolution and simultaneous electricity generation by Pt-decorated Ni<sub>3</sub>N nanosheets. *Adv. Energy Mater.* **7**, 1601390 (2017).
38. Ibupoto, Z. H. *et al.* MoS<sub>x</sub>@NiO Composite nanostructures: an advanced nonprecious catalyst for hydrogen evolution reaction in alkaline media. *Adv. Funct. Mater.* **29**, 1807562 (2019).
39. Wang, Y., Ma, J., Wang, J., Chen, S., Wang, H. & Zhang, J. Interfacial scaffolding preparation of hierarchical PBA-based derivative electrocatalysts for efficient water splitting. *Adv. Energy Mater.* **9**, 1802939 (2019).
40. Xiao, C., Li, Y., Lu, X. & Zhao, C. Bifunctional porous NiFe/NiCo<sub>2</sub>O<sub>4</sub>/Ni foam electrodes with triple hierarchy and double synergies for efficient whole cell water splitting. *Adv. Funct. Mater.* **26**, 3515-3523 (2016).
41. An, L., Huang, L., Zhou, P., Yin, J., Liu, H & Xi, P. A self-standing high-performance hydrogen evolution electrode with nanostructured NiCo<sub>2</sub>O<sub>4</sub>/CuS heterostructures. *Adv. Funct. Mater.* **25**, 6814-6822 (2015).
42. Shao, Q. *et al.* Stabilizing and activating metastable nickel nanocrystals for highly efficient hydrogen evolution electrocatalysis. *ACS Nano* **12**, 11625-11631 (2018).
43. Luo, Y. *et al.* Two-dimensional MoS<sub>2</sub> confined Co(OH)<sub>2</sub> electrocatalysts for hydrogen evolution in alkaline electrolytes. *ACS Nano* **12**, 4565-4573 (2018).
44. Yu, X. *et al.* Hydrogen evolution reaction in alkaline media: alpha- or beta-nickel hydroxide on the surface of platinum? *ACS Energy Lett.* **3**, 237-244 (2018).
45. Chen, Y. *et al.* Electrocatalytically inactive SnS<sub>2</sub> promotes water adsorption/dissociation on molybdenum dichalcogenides for accelerated alkaline hydrogen evolution. *Nano Energy* **64**, 103918 (2019).
46. Liu, S. Q. *et al.* Amorphous Ni(OH)<sub>2</sub> encounter with crystalline CuS in hollow spheres: A mesoporous nano-shelled heterostructure for hydrogen evolution electrocatalysis. *Nano Energy* **44**, 7-14 (2018).
47. Zhang, B. *et al.* Interface engineering: The Ni(OH)<sub>2</sub>/MoS<sub>2</sub> heterostructure for highly efficient alkaline hydrogen evolution. *Nano Energy* **37**, 74-80 (2017).
48. Xing, Z., Han, C., Wang, D., Li, Q. & Yang, X. Ultrafine Pt nanoparticle-decorated Co(OH)<sub>2</sub> nanosheet arrays with enhanced catalytic activity toward hydrogen evolution. *ACS Catal.* **7**, 7131-7135 (2017).
49. Lu, Q. *et al.* Crystal phase-based epitaxial growth of hybrid noble metal nanostructures on 4H/fcc Au nanowires. *Nat. Chem.* **10**, 456-461 (2018).
50. Li, Y., Wei, X., Chen, L., Shi, J. & He, M. Nickel-molybdenum nitride nanoplate electrocatalysts for concurrent electrolytic hydrogen and formate productions. *Nat. Commun.* **10**, 5335 (2019).

51. Hu, C. *et al.* In situ electrochemical production of ultrathin nickel nanosheets for hydrogen evolution electrocatalysis. *Chem* **3**, 122-133 (2017).
52. Lao, M. *et al.* Platinum/nickel bicarbonate heterostructures towards accelerated hydrogen evolution under alkaline conditions. *Angew. Chem. Int. Ed.* **58**, 5432-5437 (2019).
53. Menezes, P. W., Panda, C., Garai, S., Walter, C., Guiet, A. & Driess, M. Structurally ordered intermetallic cobalt stannide nanocrystals for high-performance electrocatalytic overall water-splitting. *Angew. Chem. Int. Ed.* **57**, 15237-15242 (2018).
54. Wang, P., Jiang, K., Wang, G., Yao, J. & Huang, X. Phase and interface engineering of platinum–nickel nanowires for efficient electrochemical hydrogen evolution. *Angew. Chem. Int. Ed.* **55**, 12859-12863 (2016).
55. Shen, Y., Zhou, Y., Wang, D., Wu, X., Li, J. & Xi, J. Nickel–copper alloy encapsulated in graphitic carbon shells as electrocatalysts for hydrogen evolution reaction. *Adv. Energy Mater.* **8**, 1701759 (2018).
56. Li, T. *et al.* Encapsulation of Ni<sub>3</sub>Fe nanoparticles in N-doped carbon nanotube–grafted carbon nanofibers as high-efficiency hydrogen evolution electrocatalysts. *Adv. Funct. Mater.* **28**, 1805828 (2018).
57. Sun, J. S., Wen, Z., Han, L. P., Chen, Z. W., Lang, X. Y. & Jiang Q. Nonprecious intermetallic Al<sub>7</sub>Cu<sub>4</sub>Ni nanocrystals seamlessly integrated in freestanding bimodal nanoporous copper for efficient hydrogen evolution catalysis. *Adv. Funct. Mater.* **28**, 1706127 (2018).
58. Schäfer, H. *et al.* Electro-oxidation of Ni42 steel: a highly active bifunctional electrocatalyst. *Adv. Funct. Mater.* **26**, 6402-6417 (2016).
59. Zeng, M. *et al.* Metallic cobalt nanoparticles encapsulated in nitrogen-enriched graphene shells: its bifunctional electrocatalysis and application in Zinc–air batteries. *Adv. Funct. Mater.* **26**, 4397-4404 (2016).
60. Ledendecker, M., Clavel, G., Antonietti, M. & Shalom, M. Highly porous materials as tunable electrocatalysts for the hydrogen and oxygen evolution reaction. *Adv. Funct. Mater.* **25**, 393-399 (2015).
61. Fang, M. *et al.* Hierarchical NiMo-based 3D electrocatalysts for highly-efficient hydrogen evolution in alkaline conditions. *Nano Energy* **27**, 247-254 (2016).
62. Li, Z. *et al.* Mesoporous hollow Cu–Ni alloy nanocage from core–shell Cu@Ni nanocube for efficient hydrogen evolution reaction. *ACS Catal.* **9**, 5084-5095 (2019).
63. Cao, L. *et al.* Identification of single-atom active sites in carbon-based cobalt catalysts during electrocatalytic hydrogen evolution. *Nat. Catal.* **2**, 134-141 (2019).
64. Zhang, H. *et al.* Dynamic traction of lattice-confined platinum atoms into mesoporous carbon matrix for hydrogen evolution reaction. *Sci. Adv.* **4**, eaao6657 (2018).
65. Fang, S. *et al.* Uncovering near-free platinum single-atom dynamics during electrochemical hydrogen evolution reaction. *Nat. Commun.* **11**, 1029 (2020).

66. Jiang, K. *et al.* Single platinum atoms embedded in nanoporous cobalt selenide as electrocatalyst for accelerating hydrogen evolution reaction. *Nat. Commun.* **10**, 1743 (2019).
67. Fei, H. *et al.* Atomic cobalt on nitrogen-doped graphene for hydrogen generation. *Nat. Commun.* **6**, 8668 (2015).
68. Liang, H. W., Brüller, S. Dong, R., Zhang, J. Feng, X. & Müllen, K. Molecular metal–N<sub>x</sub> centres in porous carbon for electrocatalytic hydrogen evolution. *Nat. Commun.* **6**, 7992 (2015).
69. Chen, W. *et al.* Rational design of single molybdenum atoms anchored on N-doped carbon for effective hydrogen evolution reaction. *Angew. Chem. Int. Ed.* **56**, 16086-16090 (2017).
70. Fang, Z. *et al.* Dual tuning of Ni–Co–A (A = P, Se, O) nanosheets by anion substitution and holey engineering for efficient hydrogen evolution. *J. Am. Chem. Soc.* **140**, 5241-5247 (2018).
71. Pan, Y. *et al.* Core–shell ZIF-8@ZIF-67-derived CoP nanoparticle-embedded N-doped carbon nanotube hollow polyhedron for efficient overall water splitting. *J. Am. Chem. Soc.* **140**, 2610-2618 (2018).
72. Tian, J., Liu, Q., Asiri, A. M. & Sun, X. Self-supported nanoporous cobalt phosphide nanowire arrays: an efficient 3D hydrogen-evolving cathode over the wide range of pH 0–14. *J. Am. Chem. Soc.* **136**, 7587-7590 (2014).
73. Pu, Z., Amiin, I. S., Kou, Z., Li, W. & Mu, S. RuP<sub>2</sub>-based catalysts with platinum-like activity and higher durability for the hydrogen evolution reaction at all pH values. *Angew. Chem. Int. Ed.* **56**, 11559-11564 (2017).
74. Ledendecker, M., Krick, Calderón. S., Papp, C., Steinrück, H. P., Antonietti, M. & Shalom, M. The synthesis of nanostructured Ni<sub>5</sub>P<sub>4</sub> films and their use as a non-noble bifunctional electrocatalyst for full water splitting. *Angew. Chem. Int. Ed.* **54**, 12361-12365 (2015).
75. Tang, C. *et al.* Fe-doped CoP nanoarray: a monolithic multifunctional catalyst for highly efficient hydrogen generation. *Adv. Mater.* **29**, 1602441 (2017).
76. Ma, Y. Y. *et al.* Highly efficient hydrogen evolution from seawater by a low-cost and stable CoMoP@C electrocatalyst superior to Pt/C. *Energy Environ. Sci.* **10**, 788-798 (2017).
77. Tan, Y. *et al.* Versatile nanoporous bimetallic phosphides towards electrochemical water splitting. *Energy Environ. Sci.* **9**, 2257-2261 (2016).
78. Xiao, P. *et al.* Molybdenum phosphide as an efficient electrocatalyst for the hydrogen evolution reaction. *Energy Environ. Sci.* **7**, 2624-2629 (2014).
79. Li, G. *et al.* Carbon-tailored semimetal MoP as an efficient hydrogen evolution electrocatalyst in both alkaline and acid media. *Adv. Energy Mater.* **8**, 1801258 (2018).
80. Liu, T. *et al.* Enhanced electrocatalysis for energy-efficient hydrogen production over CoP catalyst with nonelectroactive Zn as a promoter. *Adv. Energy Mater.* **7**, 1700020 (2017).

81. Song, J. *et al.* Bimetallic cobalt-based phosphide zeolitic imidazolate framework: CoP<sub>x</sub> phase-dependent electrical conductivity and hydrogen atom adsorption energy for efficient overall water splitting. *Adv. Energy Mater.* **7**, 1601555 (2017).
82. Zhang, X., Yu, X., Zhang, L., Zhou, F., Liang, Y. & Wang, R. Molybdenum phosphide/carbon nanotube hybrids as pH-universal electrocatalysts for hydrogen evolution reaction. *Adv. Funct. Mater.* **28**, 1706523 (2018).
83. Li, J. *et al.* Mechanistic insights on ternary Ni<sub>2-x</sub>Co<sub>x</sub>P for hydrogen evolution and their hybrids with graphene as highly efficient and robust catalysts for overall water splitting. *Adv. Funct. Mater.* **26**, 6785-6796 (2016).
84. Wang, X., Li, W., Xiong, D., Petrovykh, D. Y. & Liu, L. Bifunctional nickel phosphide nanocatalysts supported on carbon fiber paper for highly efficient and stable overall water splitting. *Adv. Funct. Mater.* **26**, 4067-4077 (2016).
85. Zhu, Y. P., Liu, Y. P., Ren, T. Z. & Yuan, Z. Y. Self-supported cobalt phosphide mesoporous nanorod arrays: a flexible and bifunctional electrode for highly active electrocatalytic water reduction and oxidation. *Adv. Funct. Mater.* **25**, 7337-7347 (2015).
86. Gao, W. *et al.* Modulating electronic structure of CoP electrocatalysts towards enhanced hydrogen evolution by Ce chemical doping in both acidic and basic media. *Nano Energy* **38**, 290-296 (2017).
87. Yu, L. *et al.* In situ growth of Ni<sub>2</sub>P–Cu<sub>3</sub>P bimetallic phosphide with bicontinuous structure on self-supported NiCuC substrate as an efficient hydrogen evolution reaction electrocatalyst. *ACS Catal.* **9**, 6919-6928 (2019).
88. Zang, Y. *et al.* Tuning orbital orientation endows molybdenum disulfide with exceptional alkaline hydrogen evolution capability. *Nat. Commun.* **10**, 1217 (2019).
89. Feng, J. X., Wu, J. Q., Tong, Y. X. & Li, G. R. Efficient hydrogen evolution on Cu nanodots-decorated Ni<sub>3</sub>S<sub>2</sub> nanotubes by optimizing atomic hydrogen adsorption and desorption. *J. Am. Chem. Soc.* **140**, 610-617 (2018).
90. Huang, Z. F. *et al.* Hollow cobalt-based bimetallic sulfide polyhedra for efficient all-pH-value electrochemical and photocatalytic hydrogen evolution. *J. Am. Chem. Soc.* **138**, 1359-1365 (2016).
91. Feng, L. L. *et al.* High-index faceted Ni<sub>3</sub>S<sub>2</sub> nanosheet arrays as highly active and ultrastable electrocatalysts for water splitting. *J. Am. Chem. Soc.* **137**, 14023-14026 (2015).
92. Zhang, J. *et al.* Interface engineering of MoS<sub>2</sub>/Ni<sub>3</sub>S<sub>2</sub> heterostructures for highly enhanced electrochemical overall-water-splitting Activity. *Angew. Chem. Int. Ed.* **55**, 6702-6707 (2016).
93. Zhang, J. *et al.* Engineering water dissociation sites in MoS<sub>2</sub> nanosheets for accelerated electrocatalytic hydrogen production. *Energy Environ. Sci.* **9**, 2789-2793 (2016).
94. Kou, T. *et al.* Theoretical and experimental insight into the effect of nitrogen doping on hydrogen evolution activity of Ni<sub>3</sub>S<sub>2</sub> in alkaline medium. *Adv. Energy Mater.* **8**, 1703538 (2018).

95. Peng, Z., Jia, D., Al-Enizi, A. M., Elzatahry, A. A. & Zheng, G. From water oxidation to reduction: homologous Ni–Co based nanowires as complementary water splitting electrocatalysts. *Adv. Energy Mater.* **5**, 1402031 (2015).
96. Wang, J. *et al.* Activating basal planes of NiPS<sub>3</sub> for hydrogen evolution by nonmetal heteroatom doping. *Adv. Funct. Mater.* **30**, 1908708 (2020).
97. Kang, Z. *et al.* Engineering an earth-abundant element-based bifunctional electrocatalyst for highly efficient and durable overall water splitting. *Adv. Funct. Mater.* **29**, 1807031 (2019).
98. Sivanantham, A., Ganesan, P. & Shanmugam, S. Hierarchical NiCo<sub>2</sub>S<sub>4</sub> Nanowire arrays supported on Ni foam: an efficient and durable bifunctional electrocatalyst for oxygen and hydrogen evolution reactions. *Adv. Funct. Mater.* **26**, 4661-4672 (2016).
99. Cao, D. *et al.* Engineering the in-plane structure of metallic phase molybdenum disulfide via Co and O dopants toward efficient alkaline hydrogen evolution. *ACS Nano* **13**, 11733-11740 (2019).
100. Liu, H. *et al.* Electronic structure reconfiguration toward pyrite NiS<sub>2</sub> via engineered heteroatom defect boosting overall water splitting. *ACS Nano* **11**, 11574-11583 (2017).
101. Yang, C., Gao, M. Y., Zhang, Q. B., Zeng, J. R., Li, X. T. & Abbott, A. P. In-situ activation of self-supported 3D hierarchically porous Ni<sub>3</sub>S<sub>2</sub> films grown on nanoporous copper as excellent pH-universal electrocatalysts for hydrogen evolution reaction. *Nano Energy* **36**, 85-94 (2017).
102. Zheng, Y. R. *et al.* Doping-induced structural phase transition in cobalt diselenide enables enhanced hydrogen evolution catalysis. *Nat. Commun.* **9**, 2533 (2018).
103. Zheng, T. *et al.* Intercalated iridium diselenide electrocatalysts for efficient pH-universal water splitting. *Angew. Chem. Int. Ed.* **58**, 14764-14769 (2019).
104. Zhang, J. Y. *et al.* Anodic hydrazine oxidation assists energy-efficient hydrogen evolution over a bifunctional cobalt perselenide nanosheet electrode. *Angew. Chem. Int. Ed.* **57**, 7649-7653 (2018).
105. Tang, C., Cheng, N., Pu, Z., Xing, W. & Sun, X. NiSe nanowire film supported on nickel foam: an efficient and stable 3D bifunctional electrode for full water splitting. *Angew. Chem. Int. Ed.* **54**, 9351-9355 (2015).
106. Liu, B. *et al.* Nickel–cobalt diselenide 3D mesoporous nanosheet networks supported on Ni foam: an all-pH highly efficient integrated electrocatalyst for hydrogen evolution. *Adv. Mater.* **29**, 1606521 (2017).
107. Chen, P. *et al.* Phase-transformation engineering in cobalt diselenide realizing enhanced catalytic activity for hydrogen evolution in an alkaline medium. *Adv. Mater.* **28**, 7527-7532 (2016).
108. Najafi, L. *et al.* Engineered MoSe<sub>2</sub>-based heterostructures for efficient electrochemical hydrogen evolution reaction. *Adv. Energy Mater.* **8**, 1703212 (2018).

109. Wu, H. B., Xia, B. Y., Yu, L., Yu, X. Y. & Lou, X. W. Porous molybdenum carbide nano-octahedrons synthesized via confined carburization in metal-organic frameworks for efficient hydrogen production. *Nat. Commun.* **6**, 6512 (2015).
110. Vrubel, H. & Hu, X. Molybdenum boride and carbide catalyze hydrogen evolution in both acidic and basic solutions. *Angew. Chem. Int. Ed.* **51**, 12703-12706 (2012).
111. Li, S., Yang, J., Song, C., Zhu, Q., Xiao, D. & Ma, D. Iron carbides: control synthesis and catalytic applications in CO<sub>x</sub> hydrogenation and electrochemical HER. *Adv. Mater.* **31**, 1901796 (2019).
112. Huang, Y., Ge, J., Hu, J., Zhang, J., Hao, J. & Wei, Y. Nitrogen-doped porous molybdenum carbide and phosphide hybrids on a carbon matrix as highly effective electrocatalysts for the hydrogen evolution reaction. *Adv. Energy Mater.* **8**, 1701601 (2018).
113. Huang, Y. *et al.* Mo<sub>2</sub>C nanoparticles dispersed on hierarchical carbon microflowers for efficient electrocatalytic hydrogen evolution. *ACS Nano* **10**, 11337-11343 (2016).
114. Chen, Y. Y. *et al.* Pomegranate-like N,P-doped Mo<sub>2</sub>C@C nanospheres as highly active electrocatalysts for alkaline hydrogen evolution. *ACS Nano* **10**, 8851-8860 (2016).
115. Jia, J. *et al.* Molybdenum carbide on hierarchical porous carbon synthesized from Cu-MoO<sub>2</sub> as efficient electrocatalysts for electrochemical hydrogen generation. *Nano Energy* **41**, 749-757 (2017).
116. Lai, J., Huang, B., Chao, Y., Chen, X. & Guo, S. Strongly coupled nickel-cobalt nitrides/carbon hybrid nanocages with Pt-like activity for hydrogen evolution catalysis. *Adv. Mater.* **31**, 1805541 (2019).
117. Zhu, C. *et al.* In situ grown epitaxial heterojunction exhibits high-performance electrocatalytic water splitting. *Adv. Mater.* **30**, 1705516 (2018).
118. Zhang, Y., Ouyang, B., Xu, J., Chen, S., Rawat, R. S. & Fan, H. J. 3D porous hierarchical nickel-molybdenum nitrides synthesized by RF plasma as highly active and stable hydrogen-evolution-reaction electrocatalysts. *Adv. Energy Mater.* **6**, 1600221 (2016).
119. Zhou, M. *et al.* Construction of polarized carbon-nickel catalytic surfaces for potent, durable, and economic hydrogen evolution reactions. *ACS Nano* **12**, 4148-4155 (2018).
120. Zheng, Y. *et al.* Hydrogen evolution by a metal-free electrocatalyst. *Nat. Commun.* **5**, 3783 (2014).
121. Lai, J., Li, S., Wu, F., Saqib, M., Luque, R. & Xu, G. Unprecedented metal-free 3D porous carbonaceous electrodes for full water splitting. *Energy Environ. Sci.* **9**, 1210-1214 (2016).
122. Qu, K., Zheng, Y., Zhang, X., Davey, K., Dai, S. & Qiao, S. Z. Promotion of electrocatalytic hydrogen evolution reaction on nitrogen-doped carbon nanosheets with secondary heteroatoms. *ACS Nano* **11**, 7293-7300 (2017).

123. Kibsgaard, J. & Jaramillo, T. F. Molybdenum phosphosulfide: Aan active, acid-stable, earth-abundant catalyst for the hydrogen evolution reaction. *Angew. Chem. Int. Ed.* **53**, 14433-14437 (2014).
124. Kibsgaard, J. *et al.* Designing an improved transition metal phosphide catalyst for hydrogen evolution using experimental and theoretical trends. *Energy Environ. Sci.* **8**, 3022-3029 (2015).
